# Supplementary material for: Iodine-mediated regioselective C–N and C–I bond formation of alkenes
Source: Royal Society of Chemistry journal article supplement (doi:10.1039/c5ra14407h), 2015-01-01

## Supporting Information

### Table of Contents

|                                                                                       |             |
|---------------------------------------------------------------------------------------|-------------|
| <b>I. General remarks .....</b>                                                       | <b>1</b>    |
| <b>II. General procedure for the preparation of 3 .....</b>                           | <b>1</b>    |
| <b>III. Crystallographic data for 3a .....</b>                                        | <b>1-7</b>  |
| <b>IV. Analytical data of products obtained in this study.....</b>                    | <b>8-13</b> |
| <b>V. <sup>1</sup>H NMR and <sup>13</sup>C NMR spectra copies of compounds 3.....</b> | <b>9-34</b> |

### I. General Remarks:

Unless otherwise stated, all commercial reagents and solvents were used without additional purification. All the reactions were carried out under air atmosphere.  $^1\text{H}$  NMR spectra were recorded at 25 °C on a Bruker Ascend™ 400 spectrometer (Germany),  $^{13}\text{C}$  NMR spectra were recorded at 25 °C on a Bruker 100 MHz, and TMS as internal standard. Melting points were obtained with a micro melting point XT4A Beijing Keyi electrooptic apparatus and are uncorrected. HRMS data were obtained on a Waters LCT Premierxe™ (USA). All reactions were monitored by TLC with Taizhou GF254 silica gel coated plates. Flash column chromatography was carried out using 300-400 mesh silica gel at increased pressure.

### II. General procedure for the preparation of 3 (1a as an example).

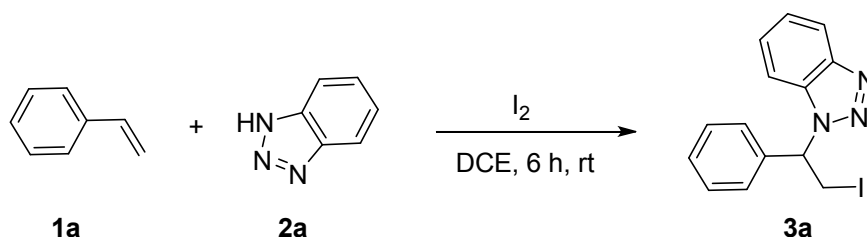

Styrene **1a** (52.0 mg, 0.5 mmol), 1H-benzo[d][1,2,3]triazole **2a** (119.1 mg, 1.0 mmol), I<sub>2</sub> (126.9 mg, 0.5mmol) were added to DCE (2 mL). The mixture was stirred at 20 °C for 6.0 h (monitored by TLC), quenched with water (10 mL), extracted with dichloromethane (5×3 mL), and dried over anhydrous Na<sub>2</sub>SO<sub>4</sub>. The solvent was removed under reduced pressure, and the residue was purified by a shot flash silica gel column chromatography (EtOAc/petro ether = 1 : 6) to give compound **3a** as a white solid (155.3 mg, 89%).

### III. Crystallographic data for 3a

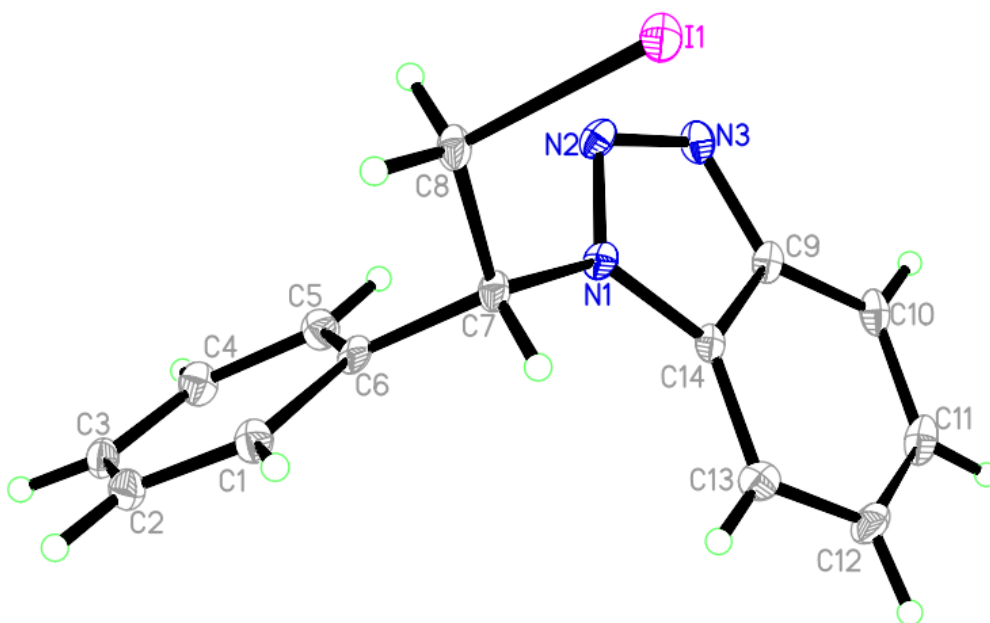

Table 1. Crystal data and structure refinement for **3a**.

|                                   |                                                                                                                      |
|-----------------------------------|----------------------------------------------------------------------------------------------------------------------|
| Identification code               | <b>3a</b>                                                                                                            |
| Empirical formula                 | C <sub>14</sub> H <sub>12</sub> IN <sub>3</sub>                                                                      |
| Formula weight                    | 349.17                                                                                                               |
| Temperature                       | 293(2) K                                                                                                             |
| Wavelength                        | 0.71073 Å                                                                                                            |
| Crystal system, space group       | Monoclinic, P2(1)/c                                                                                                  |
| Unit cell dimensions              | a = 8.7065(17) Å    alpha = 90 deg.<br>b = 13.352(3) Å    beta = 99.24(3) deg.<br>c = 11.519(2) Å    gamma = 90 deg. |
| Volume                            | 1321.7(5) Å <sup>3</sup>                                                                                             |
| Z                                 | 4                                                                                                                    |
| Calculated density                | 1.755 Mg/m <sup>3</sup>                                                                                              |
| Absorption coefficient            | 2.408 mm <sup>-1</sup>                                                                                               |
| F(000)                            | 680                                                                                                                  |
| Crystal size                      | 0.20 x 0.20 x 0.20 mm                                                                                                |
| Theta range for data collection   | 2.35 to 25.01 deg.                                                                                                   |
| Limiting indices                  | -10<=h<=8, -11<=k<=15, -8<=l<=13                                                                                     |
| Reflections collected / unique    | 4771 / 2315 [R(int) = 0.0262]                                                                                        |
| Completeness to theta = 25.01     | 99.4 %                                                                                                               |
| Absorption correction             | None                                                                                                                 |
| Refinement method                 | Full-matrix least-squares on F <sup>2</sup>                                                                          |
| Data / restraints / parameters    | 2315 / 0 / 163                                                                                                       |
| Goodness-of-fit on F <sup>2</sup> | 1.014                                                                                                                |
| Final R indices [I>2sigma(I)]     | R1 = 0.0355, wR2 = 0.1164                                                                                            |
| R indices (all data)              | R1 = 0.0382, wR2 = 0.1197                                                                                            |
| Largest diff. peak and hole       | 1.676 and -1.418 e. Å <sup>-3</sup>                                                                                  |

Table 2. Atomic coordinates ( x 10<sup>4</sup>) and equivalent isotropic displacement parameters (Å<sup>2</sup> x 10<sup>3</sup>) for **3a**. U(eq) is defined as one third of the trace of the orthogonalized U<sup>ij</sup> tensor.

|       | x        | y       | z        | U(eq) |
|-------|----------|---------|----------|-------|
| I(1)  | 7122(1)  | 724(1)  | 7827(1)  | 23(1) |
| N(1)  | 9148(3)  | 2868(2) | 8121(3)  | 18(1) |
| N(2)  | 9108(3)  | 2858(2) | 6932(3)  | 21(1) |
| C(4)  | 14114(4) | 2853(3) | 8933(3)  | 26(1) |
| C(14) | 8402(4)  | 3702(3) | 8435(3)  | 17(1) |
| C(2)  | 13922(4) | 1786(3) | 10543(3) | 25(1) |
| C(1)  | 12364(4) | 1725(3) | 10242(3) | 23(1) |
| C(7)  | 9859(4)  | 2064(3) | 8875(3)  | 19(1) |

|       |          |         |         |       |
|-------|----------|---------|---------|-------|
| C(11) | 6856(5)  | 5483(3) | 8419(4) | 27(1) |
| C(10) | 7093(4)  | 5107(3) | 7346(4) | 22(1) |
| C(8)  | 9569(4)  | 1053(3) | 8291(3) | 21(1) |
| C(6)  | 11604(4) | 2213(3) | 9226(3) | 18(1) |
| C(12) | 7335(4)  | 4970(3) | 9472(4) | 28(1) |
| C(13) | 8138(5)  | 4070(3) | 9528(4) | 22(1) |
| C(5)  | 12491(4) | 2779(3) | 8567(3) | 25(1) |
| N(3)  | 8364(3)  | 3648(3) | 6466(3) | 22(1) |
| C(3)  | 14808(4) | 2335(3) | 9902(3) | 24(1) |
| C(9)  | 7900(4)  | 4187(3) | 7369(4) | 18(1) |

---

Table 3. Bond lengths [ $\text{\AA}$ ] and angles [deg] for **3a**.

---

|              |          |
|--------------|----------|
| I(1)-C(8)    | 2.157(4) |
| N(1)-N(2)    | 1.364(4) |
| N(1)-C(14)   | 1.367(5) |
| N(1)-C(7)    | 1.455(5) |
| N(2)-N(3)    | 1.308(4) |
| C(4)-C(3)    | 1.368(5) |
| C(4)-C(5)    | 1.412(5) |
| C(4)-H(4A)   | 0.9300   |
| C(14)-C(9)   | 1.395(6) |
| C(14)-C(13)  | 1.404(5) |
| C(2)-C(1)    | 1.348(5) |
| C(2)-C(3)    | 1.364(5) |
| C(2)-H(2A)   | 0.9300   |
| C(1)-C(6)    | 1.408(5) |
| C(1)-H(1A)   | 0.9300   |
| C(7)-C(8)    | 1.512(5) |
| C(7)-C(6)    | 1.522(5) |
| C(7)-H(7A)   | 0.9800   |
| C(11)-C(10)  | 1.381(6) |
| C(11)-C(12)  | 1.397(6) |
| C(11)-H(11A) | 0.9300   |
| C(10)-C(9)   | 1.413(5) |
| C(10)-H(10A) | 0.9300   |
| C(8)-H(8A)   | 0.9700   |
| C(8)-H(8B)   | 0.9700   |
| C(6)-C(5)    | 1.390(5) |
| C(12)-C(13)  | 1.386(6) |
| C(12)-H(12A) | 0.9300   |
| C(13)-H(13A) | 0.9300   |

|                    |          |
|--------------------|----------|
| C(5)-H(5A)         | 0.9300   |
| N(3)-C(9)          | 1.377(5) |
| C(3)-H(3A)         | 0.9300   |
| N(2)-N(1)-C(14)    | 109.7(3) |
| N(2)-N(1)-C(7)     | 122.1(3) |
| C(14)-N(1)-C(7)    | 128.1(3) |
| N(3)-N(2)-N(1)     | 109.5(3) |
| C(3)-C(4)-C(5)     | 119.8(4) |
| C(3)-C(4)-H(4A)    | 120.1    |
| C(5)-C(4)-H(4A)    | 120.1    |
| N(1)-C(14)-C(9)    | 103.9(3) |
| N(1)-C(14)-C(13)   | 132.5(4) |
| C(9)-C(14)-C(13)   | 123.6(4) |
| C(1)-C(2)-C(3)     | 121.7(4) |
| C(1)-C(2)-H(2A)    | 119.1    |
| C(3)-C(2)-H(2A)    | 119.1    |
| C(2)-C(1)-C(6)     | 120.4(4) |
| C(2)-C(1)-H(1A)    | 119.8    |
| C(6)-C(1)-H(1A)    | 119.8    |
| N(1)-C(7)-C(8)     | 111.6(3) |
| N(1)-C(7)-C(6)     | 111.9(3) |
| C(8)-C(7)-C(6)     | 108.8(3) |
| N(1)-C(7)-H(7A)    | 108.1    |
| C(8)-C(7)-H(7A)    | 108.1    |
| C(6)-C(7)-H(7A)    | 108.1    |
| C(10)-C(11)-C(12)  | 122.2(4) |
| C(10)-C(11)-H(11A) | 118.9    |
| C(12)-C(11)-H(11A) | 118.9    |
| C(11)-C(10)-C(9)   | 116.4(4) |
| C(11)-C(10)-H(10A) | 121.8    |
| C(9)-C(10)-H(10A)  | 121.8    |
| C(7)-C(8)-I(1)     | 112.3(2) |
| C(7)-C(8)-H(8A)    | 109.1    |
| I(1)-C(8)-H(8A)    | 109.1    |
| C(7)-C(8)-H(8B)    | 109.1    |
| I(1)-C(8)-H(8B)    | 109.1    |
| H(8A)-C(8)-H(8B)   | 107.9    |
| C(5)-C(6)-C(1)     | 118.5(3) |
| C(5)-C(6)-C(7)     | 123.0(3) |
| C(1)-C(6)-C(7)     | 118.5(3) |
| C(13)-C(12)-C(11)  | 122.9(4) |
| C(13)-C(12)-H(12A) | 118.5    |
| C(11)-C(12)-H(12A) | 118.5    |

|                    |          |
|--------------------|----------|
| C(12)-C(13)-C(14)  | 114.6(4) |
| C(12)-C(13)-H(13A) | 122.7    |
| C(14)-C(13)-H(13A) | 122.7    |
| C(6)-C(5)-C(4)     | 119.5(4) |
| C(6)-C(5)-H(5A)    | 120.3    |
| C(4)-C(5)-H(5A)    | 120.3    |
| N(2)-N(3)-C(9)     | 107.3(3) |
| C(2)-C(3)-C(4)     | 120.0(3) |
| C(2)-C(3)-H(3A)    | 120.0    |
| C(4)-C(3)-H(3A)    | 120.0    |
| N(3)-C(9)-C(14)    | 109.5(3) |
| N(3)-C(9)-C(10)    | 130.1(4) |
| C(14)-C(9)-C(10)   | 120.3(4) |

Table 4. Anisotropic displacement parameters ( $\text{\AA}^2 \times 10^3$ ) for **3a**. The anisotropic displacement factor exponent takes the form:  $[h^2 a^{*2} U^{11} + \dots + 2 h k a^* b^* U^{12}]$

|       | U11   | U22   | U33   | U23    | U13   | U12   |
|-------|-------|-------|-------|--------|-------|-------|
| I(1)  | 19(1) | 15(1) | 35(1) | 0(1)   | 5(1)  | -2(1) |
| N(1)  | 19(2) | 9(2)  | 26(2) | -1(1)  | 5(1)  | -1(1) |
| N(2)  | 23(2) | 14(2) | 27(2) | 0(1)   | 10(1) | 0(1)  |
| C(4)  | 20(2) | 26(2) | 33(2) | 1(2)   | 7(2)  | -4(2) |
| C(14) | 12(2) | 9(2)  | 29(2) | -1(1)  | 4(1)  | -3(1) |
| C(2)  | 25(2) | 20(2) | 26(2) | -1(2)  | -1(2) | 6(2)  |
| C(1)  | 22(2) | 16(2) | 29(2) | 0(2)   | 3(2)  | 0(2)  |
| C(7)  | 17(2) | 15(2) | 25(2) | 1(2)   | 3(1)  | 3(1)  |
| C(11) | 21(2) | 11(2) | 51(3) | 0(2)   | 11(2) | -1(2) |
| C(10) | 14(2) | 17(2) | 36(2) | 8(2)   | 6(2)  | -2(2) |
| C(8)  | 15(2) | 15(2) | 33(2) | 1(2)   | 2(2)  | 0(2)  |
| C(6)  | 23(2) | 7(2)  | 25(2) | 0(1)   | 4(2)  | 4(1)  |
| C(12) | 27(2) | 21(2) | 37(2) | -11(2) | 11(2) | 1(2)  |
| C(13) | 25(2) | 15(2) | 28(2) | -3(2)  | 5(2)  | -5(2) |
| C(5)  | 25(2) | 21(2) | 27(2) | 2(2)   | 3(2)  | 1(2)  |
| N(3)  | 21(2) | 20(2) | 26(2) | 7(1)   | 3(1)  | 2(1)  |
| C(3)  | 17(2) | 24(2) | 30(2) | -5(2)  | 2(2)  | 3(2)  |
| C(9)  | 15(2) | 10(2) | 29(2) | 5(1)   | 8(2)  | -3(1) |

Table 5. Hydrogen coordinates ( $\times 10^4$ ) and isotropic displacement parameters ( $\text{\AA}^2 \times 10^3$ ) for **3a**.

|        | x     | y    | z     | U(eq) |
|--------|-------|------|-------|-------|
| H(4A)  | 14710 | 3253 | 8517  | 31    |
| H(2A)  | 14406 | 1445 | 11206 | 29    |
| H(1A)  | 11788 | 1359 | 10707 | 27    |
| H(7A)  | 9388  | 2062 | 9593  | 23    |
| H(11A) | 6361  | 6098 | 8442  | 33    |
| H(10A) | 6740  | 5440 | 6645  | 27    |
| H(8A)  | 10058 | 539  | 8819  | 26    |
| H(8B)  | 10047 | 1038 | 7586  | 26    |
| H(12A) | 7105  | 5244 | 10166 | 33    |
| H(13A) | 8475  | 3738 | 10232 | 27    |
| H(5A)  | 12019 | 3106 | 7890  | 29    |
| H(3A)  | 15882 | 2357 | 10122 | 29    |

Table 6. Torsion angles [deg] for **3a**.

|                         |           |
|-------------------------|-----------|
| C(14)-N(1)-N(2)-N(3)    | -0.2(4)   |
| C(7)-N(1)-N(2)-N(3)     | 178.0(3)  |
| N(2)-N(1)-C(14)-C(9)    | 0.5(4)    |
| C(7)-N(1)-C(14)-C(9)    | -177.6(3) |
| N(2)-N(1)-C(14)-C(13)   | -178.9(4) |
| C(7)-N(1)-C(14)-C(13)   | 3.0(6)    |
| C(3)-C(2)-C(1)-C(6)     | 1.6(6)    |
| N(2)-N(1)-C(7)-C(8)     | -37.2(4)  |
| C(14)-N(1)-C(7)-C(8)    | 140.7(3)  |
| N(2)-N(1)-C(7)-C(6)     | 85.1(4)   |
| C(14)-N(1)-C(7)-C(6)    | -97.0(4)  |
| C(12)-C(11)-C(10)-C(9)  | -2.3(6)   |
| N(1)-C(7)-C(8)-I(1)     | -58.8(3)  |
| C(6)-C(7)-C(8)-I(1)     | 177.2(2)  |
| C(2)-C(1)-C(6)-C(5)     | -1.9(5)   |
| C(2)-C(1)-C(6)-C(7)     | 175.8(3)  |
| N(1)-C(7)-C(6)-C(5)     | -24.1(5)  |
| C(8)-C(7)-C(6)-C(5)     | 99.7(4)   |
| N(1)-C(7)-C(6)-C(1)     | 158.3(3)  |
| C(8)-C(7)-C(6)-C(1)     | -77.9(4)  |
| C(10)-C(11)-C(12)-C(13) | 2.8(6)    |
| C(11)-C(12)-C(13)-C(14) | -1.4(6)   |
| N(1)-C(14)-C(13)-C(12)  | 179.0(4)  |
| C(9)-C(14)-C(13)-C(12)  | -0.3(5)   |

|                        |           |
|------------------------|-----------|
| C(1)-C(6)-C(5)-C(4)    | -0.3(5)   |
| C(7)-C(6)-C(5)-C(4)    | -177.9(3) |
| C(3)-C(4)-C(5)-C(6)    | 2.8(6)    |
| N(1)-N(2)-N(3)-C(9)    | -0.2(4)   |
| C(1)-C(2)-C(3)-C(4)    | 0.9(6)    |
| C(5)-C(4)-C(3)-C(2)    | -3.1(6)   |
| N(2)-N(3)-C(9)-C(14)   | 0.5(4)    |
| N(2)-N(3)-C(9)-C(10)   | 178.5(4)  |
| N(1)-C(14)-C(9)-N(3)   | -0.6(4)   |
| C(13)-C(14)-C(9)-N(3)  | 178.9(3)  |
| N(1)-C(14)-C(9)-C(10)  | -178.8(3) |
| C(13)-C(14)-C(9)-C(10) | 0.7(5)    |
| C(11)-C(10)-C(9)-N(3)  | -177.2(4) |
| C(11)-C(10)-C(9)-C(14) | 0.6(5)    |

---



#### IV. Analytical data of products obtained in this study

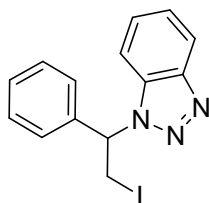

##### 1-(2-iodo-1-phenylethyl)-1H-benzo[d][1,2,3]triazole 3a

White solid. Mp: 82-83 °C;  $^1\text{H}$  NMR (400 MHz;  $\text{CDCl}_3$ ):  $\delta$  = 4.04 (q,  $J$  = 5.2, 1H), 4.47 (t,  $J$  = 10.4, 1H), 5.57 (q,  $J$  = 5.2, 1H), 7.34-7.45 (m, 8H), 8.09 (d,  $J$  = 8.0, 1H).  $^{13}\text{C}$  NMR (100 MHz;  $\text{CDCl}_3$ ):  $\delta$  = 5.1, 65.5, 109.3, 120.2, 124.2, 126.8, 127.6, 129.2, 133.1, 137.5, 146.0. HRMS (ESI-TOF) Calcd for  $\text{C}_{14}\text{H}_{13}\text{IN}_3$ ,  $[\text{M}+\text{H}]^+$  350.0152; Found 350.0157.

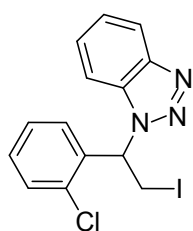

##### 1-(1-(2-chlorophenyl)-2-iodoethyl)-1H-benzo[d][1,2,3]triazole 3b

White solid. Mp: 103-104 °C;  $^1\text{H}$  NMR (400 MHz;  $\text{CDCl}_3$ ):  $\delta$  = 4.03 (q,  $J$  = 5.2, 1H), 4.37 (t,  $J$  = 10.4, 1H), 6.50 (q,  $J$  = 5.2, 1H), 7.19-7.50 (m, 7H), 8.09 (d,  $J$  = 8.0, 1H).  $^{13}\text{C}$  NMR (100 MHz;  $\text{CDCl}_3$ ):  $\delta$  = 3.5, 61.1, 109.4, 120.1, 124.4, 127.8, 127.9, 129.9, 130.3, 132.6, 133.3, 135.4, 145.8. HRMS (ESI-TOF) Calcd for  $\text{C}_{14}\text{H}_{12}\text{ClIN}_3$ ,  $[\text{M}+\text{H}]^+$  383.9764; Found 383.9760.

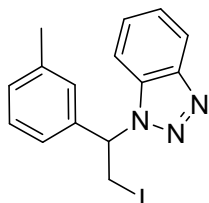

##### 1-(2-iodo-1-(m-tolyl)ethyl)-1H-benzo[d][1,2,3]triazole 3c

White solid. Mp: 80-81 °C;  $^1\text{H}$  NMR (400 MHz;  $\text{CDCl}_3$ ):  $\delta$  = 2.31 (s, 3H), 4.02 (q,  $J$  = 5.2, 1H), 4.47 (t,  $J$  = 10.4, 1H), 5.96 (q,  $J$  = 5.2, 1H), 7.13 (d,  $J$  = 6.4, 1H), 7.23 (d,  $J$  = 6.4, 3H), 7.36 (t,  $J$  = 4.2, 1H), 7.44-7.45 (m, 1H), 8.08 (d,  $J$  = 8.4, 1H).  $^{13}\text{C}$  NMR (100 MHz;  $\text{CDCl}_3$ ):  $\delta$  = 5.3, 21.4, 65.6, 109.4, 120.1, 123.9, 124.2, 127.3, 127.6, 129.0, 129.3, 129.9, 133.1, 137.4, 139.1, 146.0. HRMS (ESI-TOF) Calcd for  $\text{C}_{15}\text{H}_{15}\text{IN}_3$ ,  $[\text{M}+\text{H}]^+$  364.0309; Found 364.0314.

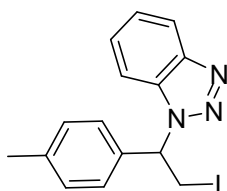

##### 1-(2-iodo-1-(p-tolyl)ethyl)-1H-benzo[d][1,2,3]triazole 3d

White solid. Mp: 85-87 °C; <sup>1</sup>H NMR (400 MHz; CDCl<sub>3</sub>): δ = 2.31 (s, 3H), 4.02 (q, *J* = 5.2, 1H), 4.46 (t, *J* = 10.4, 1H), 5.96 (q, *J* = 5.2, 1H), 7.15 (d, *J* = 8.0, 1H), 7.30 (d, *J* = 8.0, 2H), 7.35-7.44 (m, 3H), 8.08 (d, *J* = 8.0, 1H). <sup>13</sup>C NMR (100 MHz; CDCl<sub>3</sub>): δ = 5.3, 21.2, 65.3, 109.4, 120.1, 124.1, 126.7, 127.6, 129.8, 133.0, 134.5, 139.1, 146.1. HRMS (ESI-TOF) Calcd for C<sub>15</sub>H<sub>15</sub>IN<sub>3</sub>, [M+H]<sup>+</sup> 364.0309; Found 364.0315.

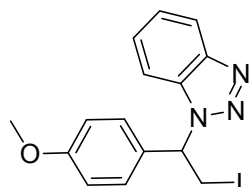

**1-(2-iodo-1-(4-methoxyphenyl)ethyl)-1H-benzo[d][1,2,3]triazole 3e**

White solid. Mp: 98-99 °C; <sup>1</sup>H NMR (400 MHz; CDCl<sub>3</sub>): δ = 3.74 (s, 3H), 3.99 (q, *J* = 5.2, 1H), 4.43 (t, *J* = 10.4, 1H), 5.96 (q, *J* = 5.2, 1H), 6.84 (d, *J* = 8.8, 2H), 7.33 (t, *J* = 8.4, 3H), 7.42 (d, *J* = 4.4, 2H), 8.06 (d, *J* = 8.0, 1H). <sup>13</sup>C NMR (100 MHz; CDCl<sub>3</sub>): δ = 5.7, 55.3, 64.9, 109.5, 114.5, 120.1, 124.1, 127.6, 128.1, 129.5, 132.9, 146.0, 160.0. HRMS (ESI-TOF) Calcd for C<sub>15</sub>H<sub>15</sub>ION<sub>3</sub>, [M+H]<sup>+</sup> 380.0260; Found 380.0265.

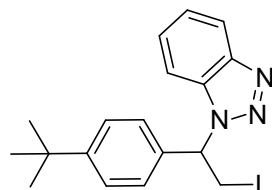

**1-(1-(4-(tert-butyl)phenyl)-2-iodoethyl)-1H-benzo[d][1,2,3]triazole 3f**

White solid. Mp: 85-86 °C; <sup>1</sup>H NMR (400 MHz; CDCl<sub>3</sub>): δ = 1.28 (s, 9H), 4.00 (q, *J* = 4.8, 1H), 4.48 (t, *J* = 10.4, 1H), 5.96 (q, *J* = 5.2, 1H), 7.37-7.45 (m, 7H), 8.09 (d, *J* = 8.4, 1H). <sup>13</sup>C NMR (100 MHz; CDCl<sub>3</sub>): δ = 5.3, 31.2, 34.6, 65.3, 109.4, 120.2, 124.1, 126.1, 126.4, 127.5, 133.1, 134.5, 146.0, 152.3. HRMS (ESI-TOF) Calcd for C<sub>18</sub>H<sub>21</sub>IN<sub>3</sub>, [M+H]<sup>+</sup> 406.0780; Found 406.0774.

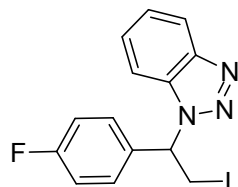

**1-(1-(4-fluorophenyl)-2-iodoethyl)-1H-benzo[d][1,2,3]triazole 3g**

White solid. Mp: 91-92 °C; <sup>1</sup>H NMR (400 MHz; CDCl<sub>3</sub>): δ = 4.01 (q, *J* = 5.2, 1H), 4.34 (t, *J* = 10.4, 1H), 5.96 (q, *J* = 5.2, 1H), 7.05 (d, *J* = 8.8, 2H), 7.40-7.45 (m, 5H), 8.09 (d, *J* = 8.4, 1H). <sup>13</sup>C NMR (100 MHz; CDCl<sub>3</sub>): δ = 4.9, 64.7, 109.1, 116.1, 116.3, 120.3, 124.3, 127.8, 128.7, 128.8, 132.9, 133.3, 133.4, 146.0, 161.7, 164.2. HRMS (ESI-TOF) Calcd for C<sub>14</sub>H<sub>13</sub>IFN<sub>3</sub>, [M+H]<sup>+</sup> 368.0062; Found 368.0067.

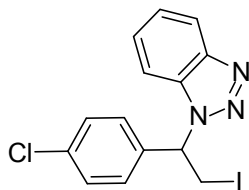

**1-(1-(4-chlorophenyl)-2-iodoethyl)-1H-benzo[d][1,2,3]triazole 3h**

White solid. Mp: 118-120 °C; <sup>1</sup>H NMR (400 MHz; CDCl<sub>3</sub>): δ = 4.01 (q, *J* = 5.2, 1H), 4.42 (t, *J* = 10.4, 1H), 5.94 (q, *J* = 5.2, 1H), 7.33-7.49 (m, 7H), 8.10 (d, *J* = 8.0, 1H). <sup>13</sup>C NMR (100 MHz; CDCl<sub>3</sub>): δ = 4.6, 64.8, 109.1, 120.3, 124.3, 127.8, 129.4, 132.9, 135.2, 135.9, 146.0. HRMS (ESI-TOF) Calcd for C<sub>14</sub>H<sub>12</sub>IClN<sub>3</sub>, [M+H]<sup>+</sup> 383.9764; Found 383.9769.

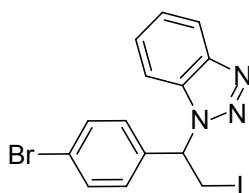

**1-(1-(4-bromophenyl)-2-iodoethyl)-1H-benzo[d][1,2,3]triazole 3i**

Yellow solid. Mp: 125-126 °C; <sup>1</sup>H NMR (400 MHz; CDCl<sub>3</sub>): δ = 4.40 (t, *J* = 5.2, 1H), 4.39 (d, *J* = 10.4, 1H), 5.96 (q, *J* = 5.2, 1H), 7.33-7.50 (m, 7H), 8.12 (d, *J* = 8.4, 1H). <sup>13</sup>C NMR (100 MHz; CDCl<sub>3</sub>): δ = 4.7, 64.8, 109.2, 120.3, 123.4, 124.4, 127.9, 128.6, 132.1, 132.9, 136.5, 145.9. HRMS (ESI-TOF) Calcd for C<sub>14</sub>H<sub>12</sub>IBrN<sub>3</sub>, [M+H]<sup>+</sup> 427.9254; Found 427.9259.

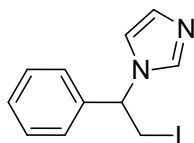

**1-(2-iodo-1-phenylethyl)-1H-imidazole 3j**

White solid. Mp: 70-71 °C; <sup>1</sup>H NMR (400 MHz; CDCl<sub>3</sub>): δ = 3.78 (q, *J* = 5.2, 1H), 4.17 (t, *J* = 10.4, 1H), 5.49 (q, *J* = 5.2, 1H), 7.33-7.46 (m, 6H), 7.64 (d, *J* = 1.6, 1H). <sup>13</sup>C NMR (100 MHz; CDCl<sub>3</sub>): δ = 4.7, 67.8, 105.6, 126.8, 128.7, 129.5, 138.8, 140.0. HRMS (ESI-TOF) Calcd for C<sub>11</sub>H<sub>12</sub>IN<sub>2</sub>, [M+H]<sup>+</sup> 299.0044; Found 299.0048.

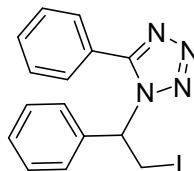

**1-(2-iodo-1-phenylethyl)-5-phenyl-1H-tetrazole 3k**

Yellow solid. Mp: 87-88 °C; <sup>1</sup>H NMR (400 MHz; CDCl<sub>3</sub>): δ = 4.03 (q, *J* = 5.2, 1H), 4.47 (t, *J* = 10.4, 1H), 5.98 (q, *J* = 5.2, 1H), 7.34-7.45 (m, 8H), 8.09 (d, *J* = 8.4, 1H). <sup>13</sup>C NMR (100 MHz; CDCl<sub>3</sub>): δ = 5.1, 65.5, 109.3, 120.2, 124.2, 126.8, 127.6, 129.2, 133.1, 137.5, 146.1. HRMS (ESI-TOF) Calcd for C<sub>15</sub>H<sub>14</sub>IN<sub>4</sub>, [M+H]<sup>+</sup> 377.0264; Found 377.0268.

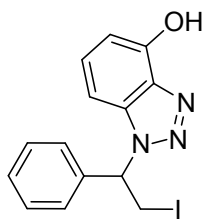

**1-(2-iodo-1-phenylethyl)-1H-benzo[d][1,2,3]triazol-4-ol 3l**

Yellow solid. Mp: 97-98 °C; <sup>1</sup>H NMR (400 MHz; CDCl<sub>3</sub>): δ = 4.03 (q, *J* = 5.2, 1H), 4.47 (t, *J* = 10.4, 1H), 5.98 (q, *J* = 5.2, 1H), 7.35-7.44 (m, 6H), 8.09 (d, *J* = 8.4, 1H). <sup>13</sup>C NMR (100 MHz; CDCl<sub>3</sub>): δ = 4.9, 65.6, 109.3, 120.2, 126.1, 126.8, 127.6, 128.2, 133.1, 137.5, 146.1. HRMS (ESI-TOF) Calcd for C<sub>14</sub>H<sub>13</sub>ION<sub>3</sub>, [M+H]<sup>+</sup> 366.0104; Found 366.0112.

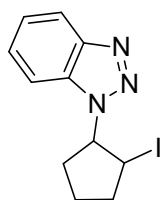

**1-(2-iodocyclopentyl)-1H-benzo[d][1,2,3]triazole 3m**

Yellow liquid. <sup>1</sup>H NMR (400 MHz; CDCl<sub>3</sub>): δ = 2.09-2.31 (m, 3H), 2.46-2.59 (m, 3H), 4.63 (t, *J* = 6.8, 1H), 5.34 (t, *J* = 8.0, 1H), 7.39 (d, *J* = 7.6, 1H), 7.52 (d, *J* = 6.8, 1H), 7.59 (d, *J* = 8.0, 1H), 8.07 (d, *J* = 8.0, 1H). <sup>13</sup>C NMR (100 MHz; CDCl<sub>3</sub>): δ = 23.8, 26.9, 30.5, 38.0, 69.6, 105.5, 120.1, 124.1, 127.4, 133.2, 145.7. HRMS (ESI-TOF) Calcd for C<sub>11</sub>H<sub>13</sub>IN<sub>3</sub>, [M+H]<sup>+</sup> 314.0154; Found 314.0150.

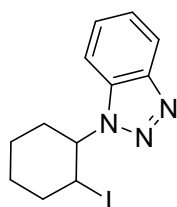

**1-(2-iodocyclohexyl)-1H-benzo[d][1,2,3]triazole 3n**

Yellow liquid. <sup>1</sup>H NMR (400 MHz; CDCl<sub>3</sub>): δ = 1.26-1.77 (m, 4H), 2.09-2.31 (m, 4H), 2.78 (d, *J* = 13.6, 1H), 4.77 (q, *J* = 4.0, 1H), 4.87 (t, *J* = 4.4, 1H), 7.40 (t, *J* = 7.2, 1H), 7.52-7.58 (m, 2H), 8.09 (d, *J* = 8.4, 1H). <sup>13</sup>C NMR (100 MHz; CDCl<sub>3</sub>): δ = 25.2, 27.9, 31.5, 34.3, 40.2, 65.4, 109.4, 120.2, 123.9, 127.2, 133.2, 145.7. HRMS (ESI-TOF) Calcd for C<sub>12</sub>H<sub>15</sub>IN<sub>3</sub>, [M+H]<sup>+</sup> 328.0311; Found 328.0317.

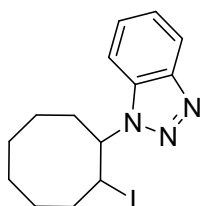

**1-(2-iodocyclooctyl)-1H-benzo[d][1,2,3]triazole 3o**

Yellow solid. Mp: 106-108 °C; <sup>1</sup>H NMR (400 MHz; CDCl<sub>3</sub>): δ = 1.56-1.91 (m, 8H), 2.04-2.49 (m, 4H), 5.24 (t, *J* = 8.4, 1H), 5.33 (q, *J* = 3.2, 1H), 7.36 (q, *J* = 4.4, 1H), 7.38-7.53 (m, 2H), 8.07 (d, *J* = 8.0, 1H). <sup>13</sup>C NMR (100 MHz; CDCl<sub>3</sub>): δ = 25.4, 25.6, 27.1, 27.8, 33.7, 33.9, 38.1, 67.8, 109.4, 120.1, 123.9, 127.2, 132.4, 145.8. HRMS (ESI-TOF) Calcd for C<sub>14</sub>H<sub>19</sub>IN<sub>3</sub>, [M+H]<sup>+</sup> 356.0621; Found 356.0626.

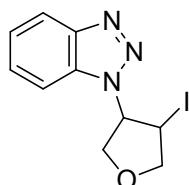

**1-(4-iodotetrahydrofuran-3-yl)-1H-benzo[d][1,2,3]triazole 3p**

Yellow liquid. <sup>1</sup>H NMR (400 MHz; CDCl<sub>3</sub>): δ = 4.26 (t, *J* = 8.4, 1H), 4.51 (d, *J* = 6.0, 2H), 4.65 (d, *J* = 6.0, 2H), 5.68 (t, *J* = 4.4, 1H), 7.44 (d, *J* = 8.0, 1H), 7.56 (q, *J* = 7.2, 1H), 7.66 (d, *J* = 8.4, 1H), 8.11 (d, *J* = 8.4, 1H). <sup>13</sup>C NMR (100 MHz; CDCl<sub>3</sub>): δ = 20.1, 69.1, 70.6, 76.7, 109.3, 120.5, 124.5, 128.0, 132.2, 146.3. HRMS (ESI-TOF) Calcd for C<sub>10</sub>H<sub>11</sub>ION<sub>3</sub>, [M+H]<sup>+</sup> 315.9945; Found 313.9939.

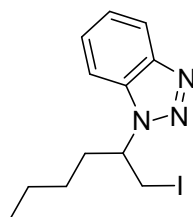

**1-(1-iodohexan-2-yl)-1H-benzo[d][1,2,3]triazole 3q**

Yellow liquid. <sup>1</sup>H NMR (400 MHz; CDCl<sub>3</sub>): δ = 1.04-1.31 (m, 7H), 2.22-2.37 (m, 2H), 3.74-3.88 (m, 2H), 4.91 (t, *J* = 4.8, 1H), 7.38-7.41 (m, 1H), 7.51 (d, *J* = 6.0, 2H), 8.10 (d, *J* = 8.4, 1H). <sup>13</sup>C NMR (100 MHz; CDCl<sub>3</sub>): δ = 20.1, 69.1, 70.6, 76.7, 109.3, 120.5, 124.5, 128.0, 132.2, 146.3. HRMS (ESI-TOF) Calcd for C<sub>12</sub>H<sub>17</sub>IN<sub>3</sub>, [M+H]<sup>+</sup> 330.0465; Found 330.0461.

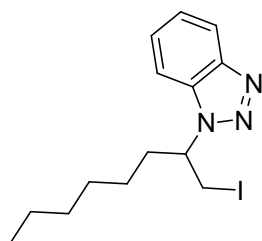

**1-(1-iodooctan-2-yl)-1H-benzo[d][1,2,3]triazole 3r**

Yellow liquid. <sup>1</sup>H NMR (400 MHz; CDCl<sub>3</sub>): δ = 0.86 (t, *J* = 6.8, 3H), 1.24-1.40 (m, 7H), 1.63-1.83 (m, 4H), 4.61 (dd, *J*<sub>1</sub> = 1.6, *J*<sub>2</sub> = 8.8, 2H), 5.03 (q, *J* = 6.8, 1H), 7.42 (t, *J* = 7.2, 1H), 7.55 (q, *J* = 6.8, 2H), 8.06 (d, *J* = 8.4, 1H). <sup>13</sup>C NMR (100 MHz; CDCl<sub>3</sub>): δ = 13.9, 22.5, 28.2, 29.7, 30.8, 31.5, 37.1, 55.9, 109.3, 120.2, 124.1, 127.6, 133.2, 145.7. HRMS (ESI-TOF) Calcd for C<sub>14</sub>H<sub>21</sub>IN<sub>3</sub>, [M+H]<sup>+</sup> 358.0780; Found 358.0774.

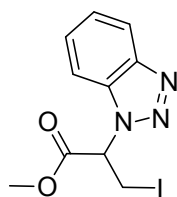

**methyl 2-(1*H*-benzo[*d*][1,2,3]triazol-1-yl)-3-iodopropanoate 3s**

Yellow liquid. <sup>1</sup>H NMR (400 MHz; CDCl<sub>3</sub>): δ = 3.68 (s, 3H), 4.99-5.11 (m, 2H), 5.21 (q, *J* = 8.8, 1H), 7.38 (t, *J* = 7.2, 1H), 7.53 (d, *J* = 0.8, 1H), 7.64 (q, *J* = 8.4, 1H), 8.05 (d, *J* = 8.4, 1H). <sup>13</sup>C NMR (100 MHz; CDCl<sub>3</sub>): δ = 13.9, 22.5, 28.2, 29.7, 30.8, 31.5, 37.1, 55.9, 109.3, 120.2, 124.1, 127.6, 133.2, 145.7. HRMS (ESI-TOF) Calcd for C<sub>10</sub>H<sub>11</sub>IO<sub>2</sub>N<sub>3</sub>, [M+H]<sup>+</sup> 331.9896; Found 331.9890.

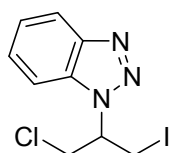

**1-(1-chloro-3-iodopropan-2-yl)-1*H*-benzo[*d*][1,2,3]triazole 3t**

Yellow liquid. <sup>1</sup>H NMR (400 MHz; CDCl<sub>3</sub>): δ = 3.94 (t, *J* = 8.0, 2H), 4.86 (q, *J* = 4.8, 1H), 5.08 (t, *J* = 6.8, 1H), 5.19 (q, *J* = 8.4, 1H), 7.42 (t, *J* = 8.0, 1H), 7.56 (t, *J* = 8.4, 1H), 7.64 (d, *J* = 8.4, 1H), 8.11 (d, *J* = 8.4, 1H). <sup>13</sup>C NMR (100 MHz; CDCl<sub>3</sub>): δ = 25.2, 47.7, 52.3, 62.5, 109.3, 120.2, 124.2, 127.9, 133.3, 145.7. HRMS (ESI-TOF) Calcd for C<sub>9</sub>H<sub>10</sub>IClN<sub>3</sub>, [M+H]<sup>+</sup> 321.9606; Found 321.9601.

**V. <sup>1</sup>H NMR and <sup>13</sup>C NMR spectra copies of compounds 3**

# Compound 3a

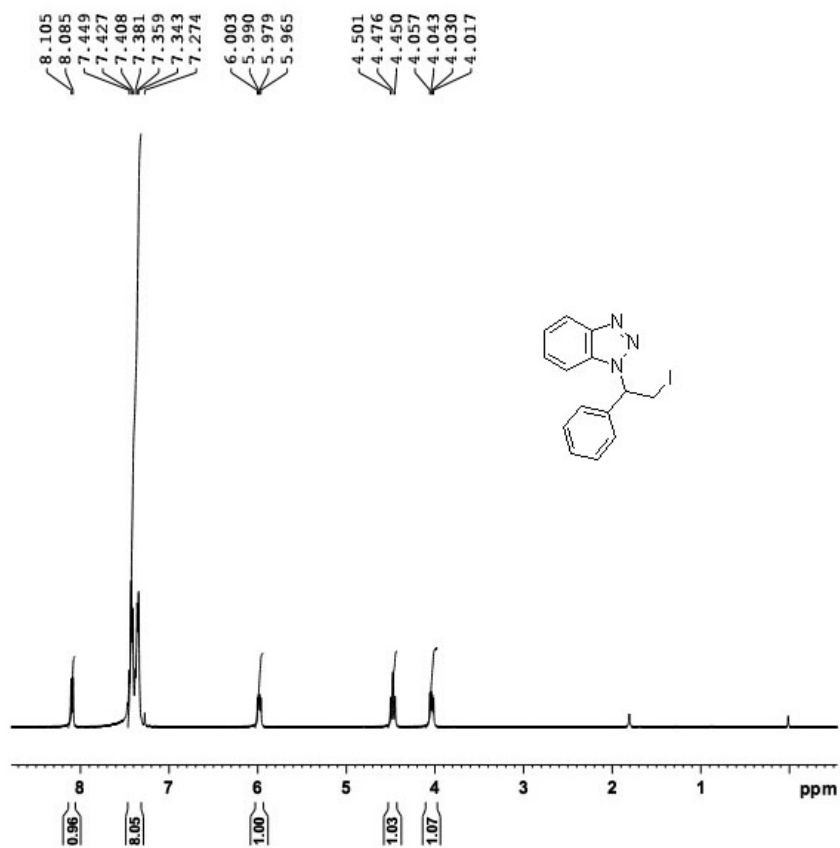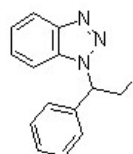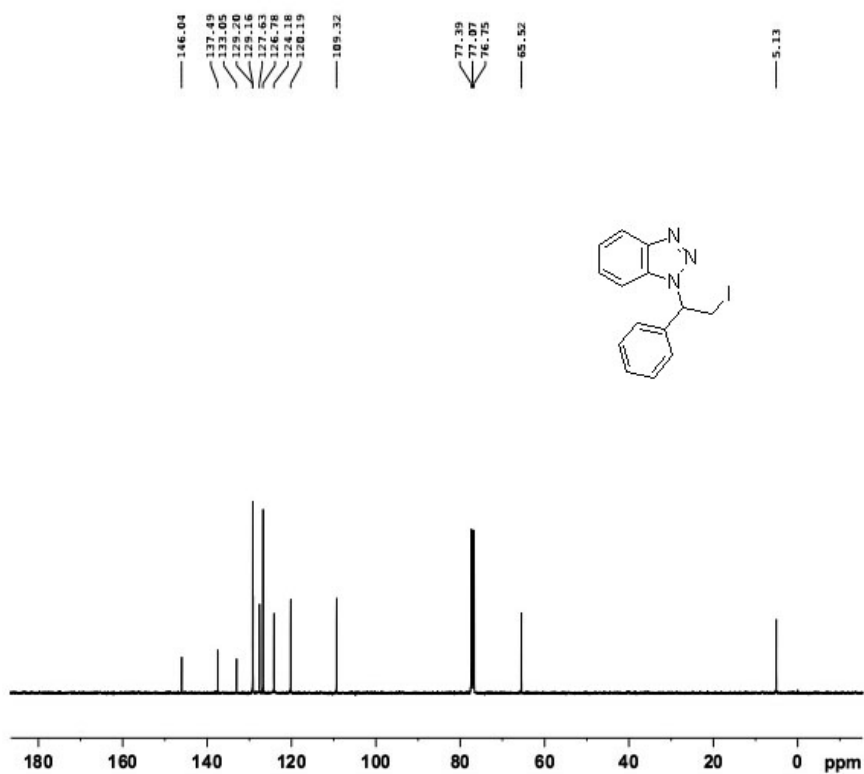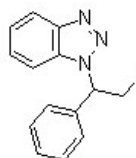

Compound 3b

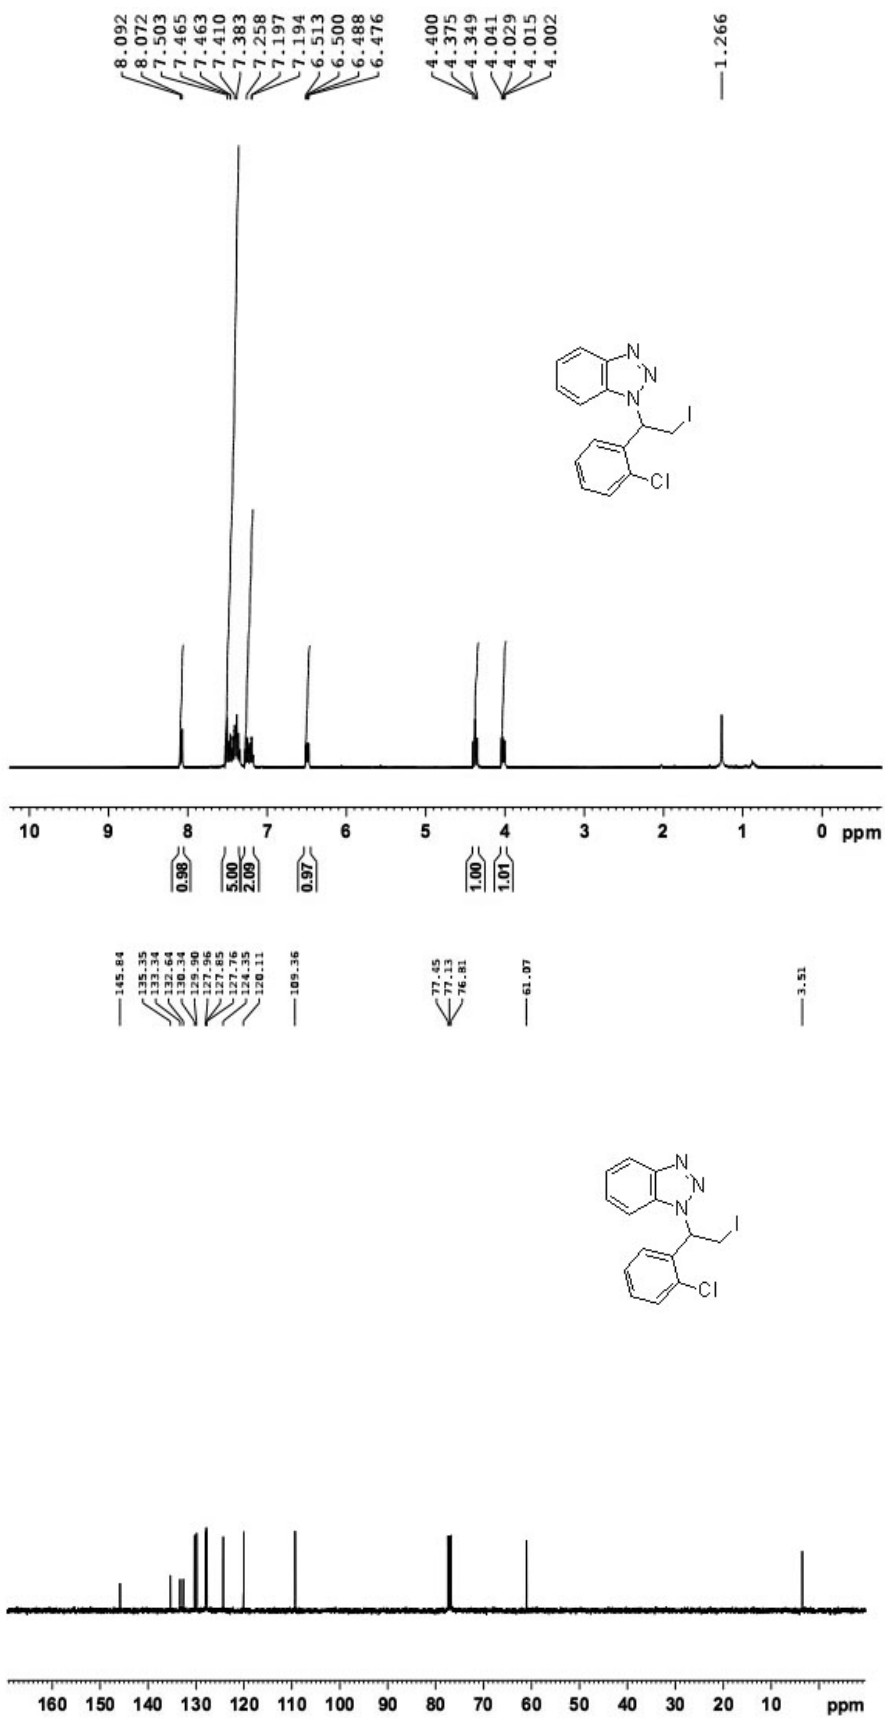



# Compound 3c

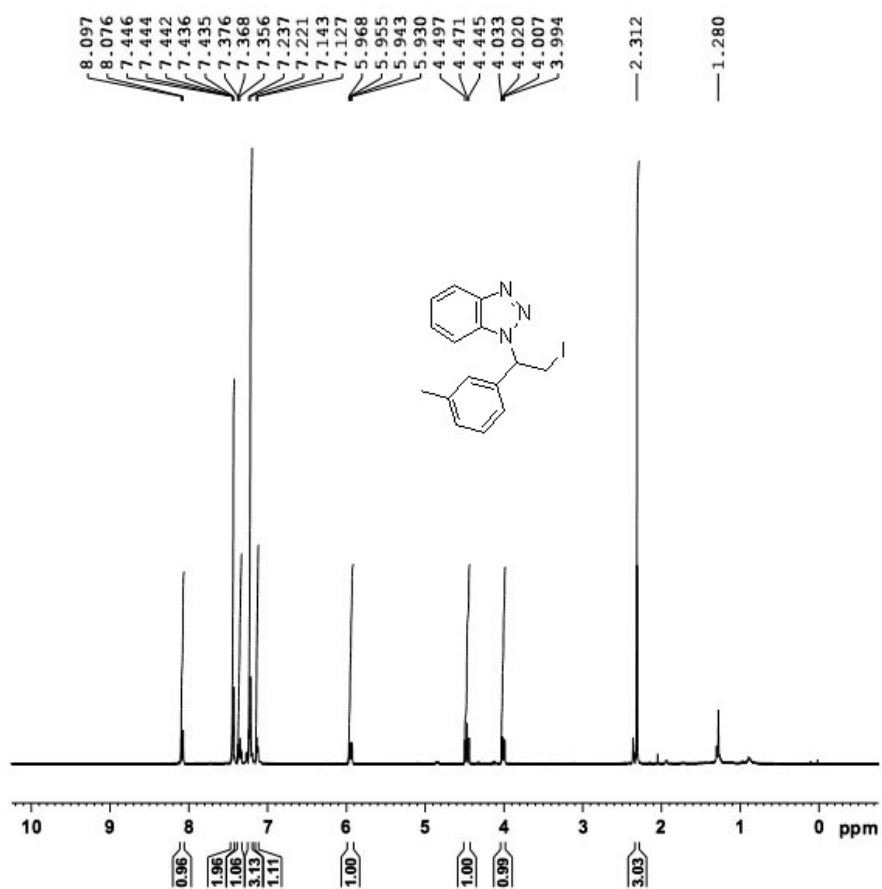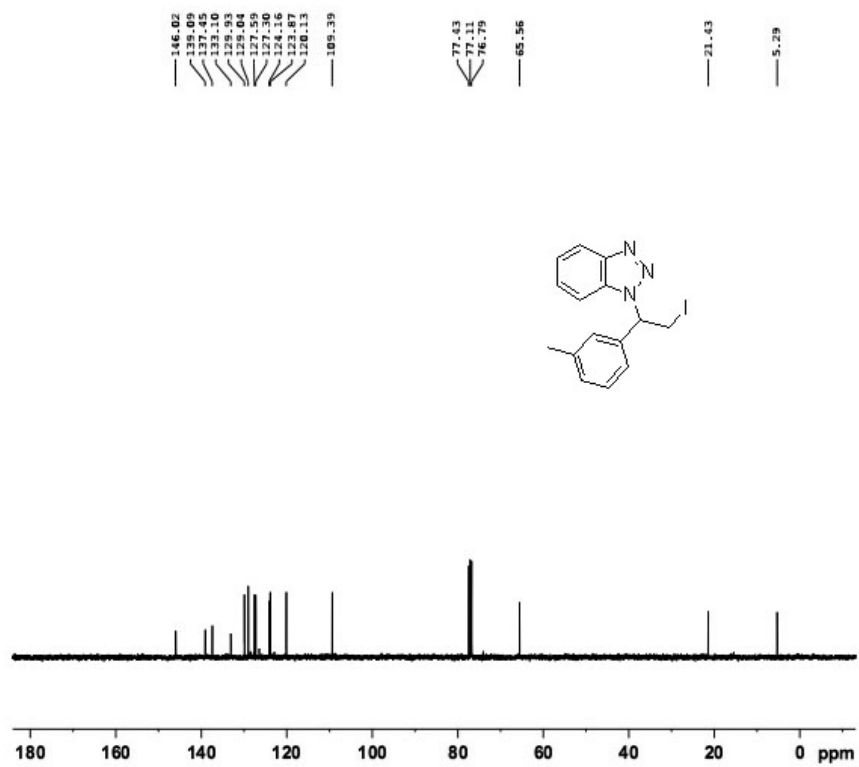

# Compound 3d

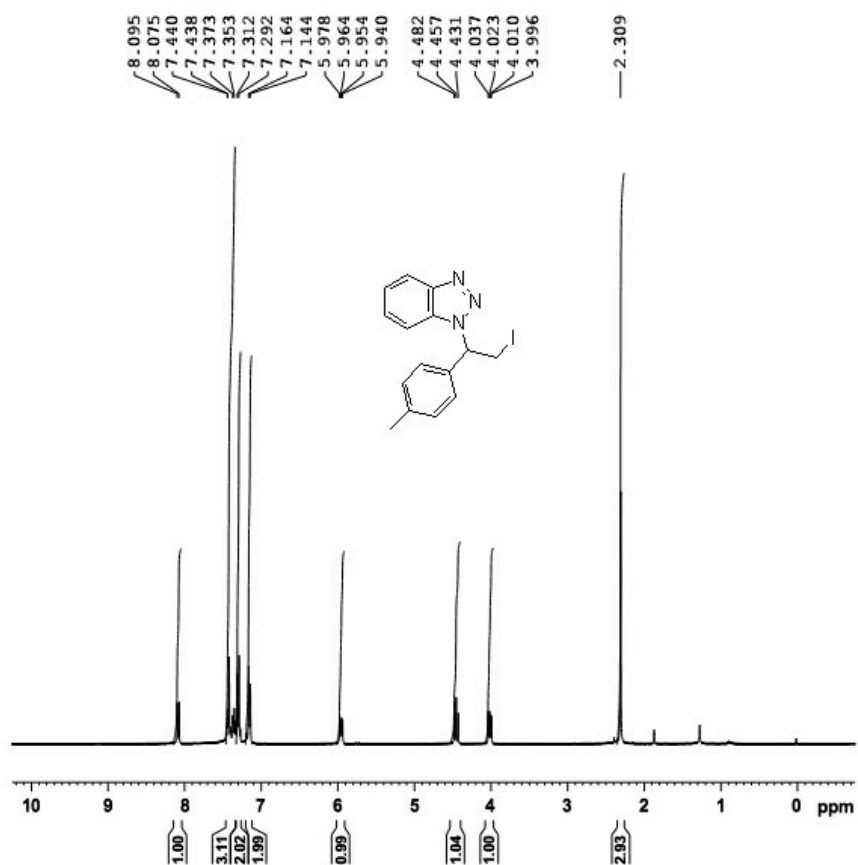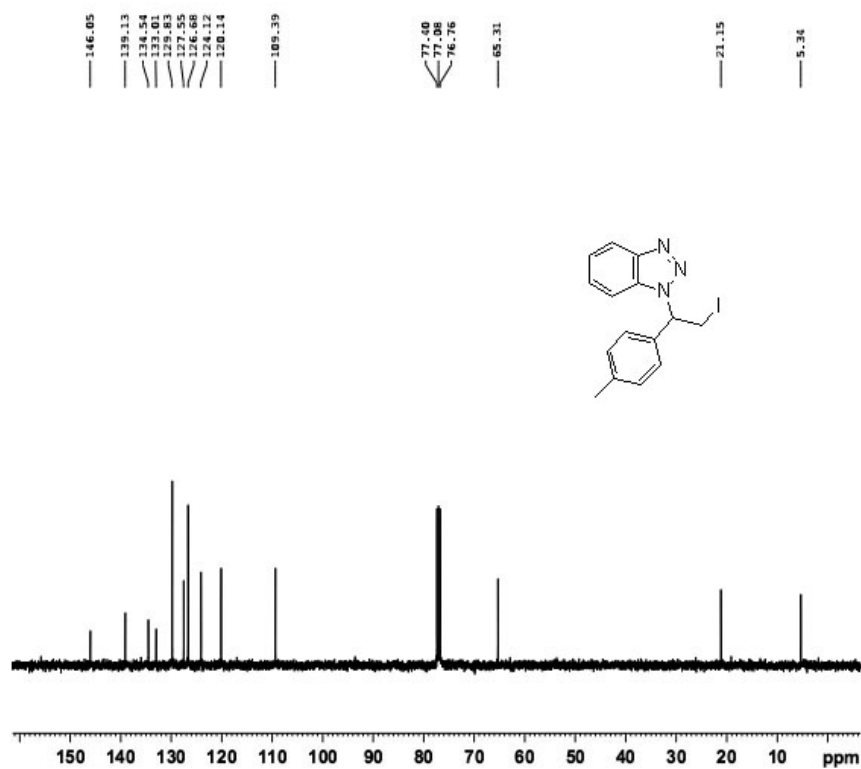

# Compound 3e

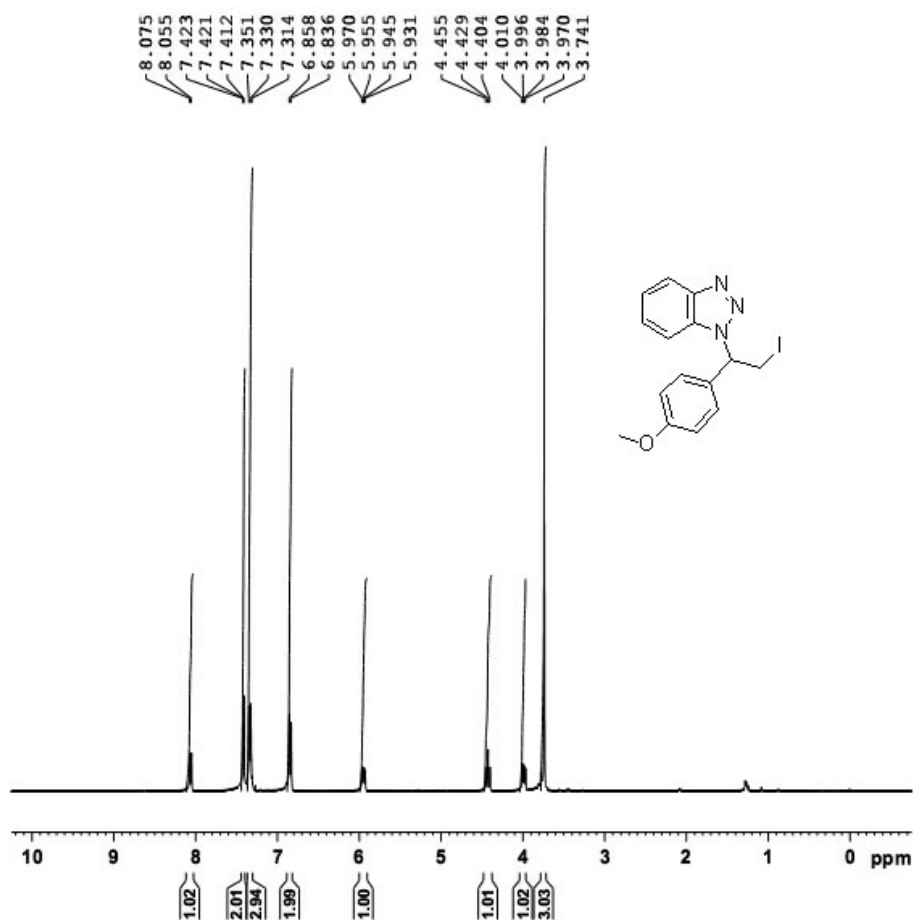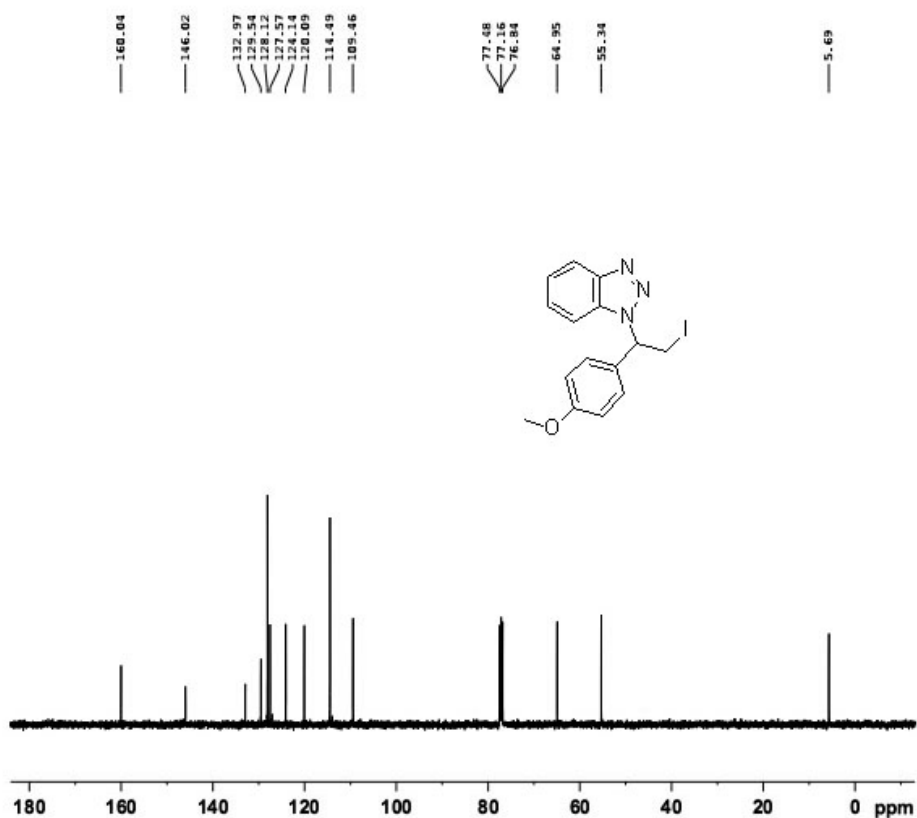

# Compound 3f

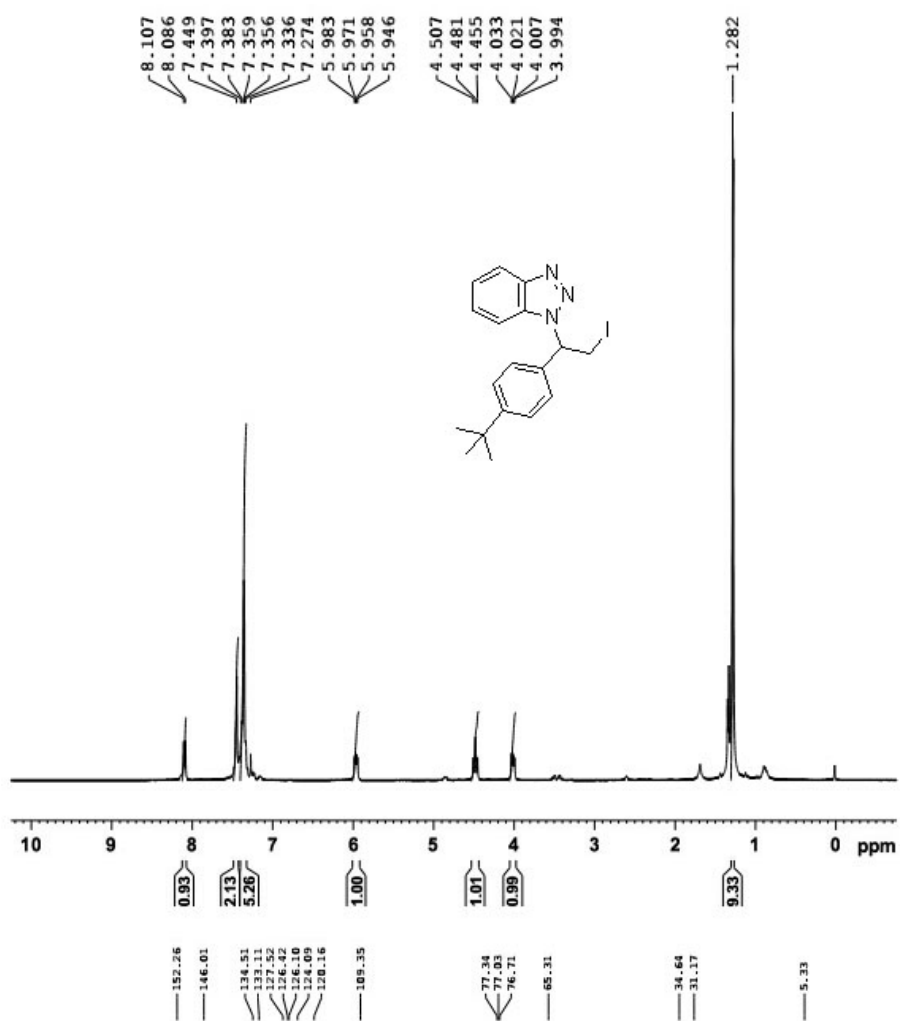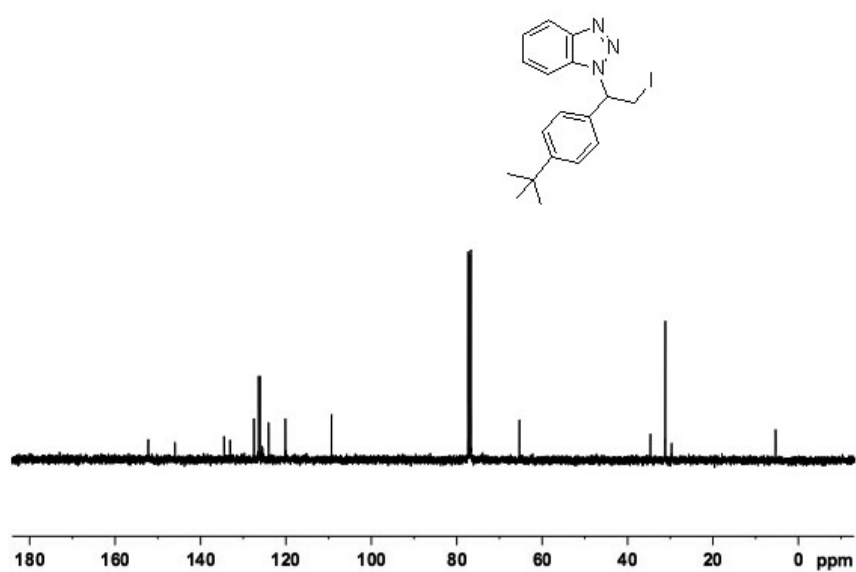

# Compound 3g

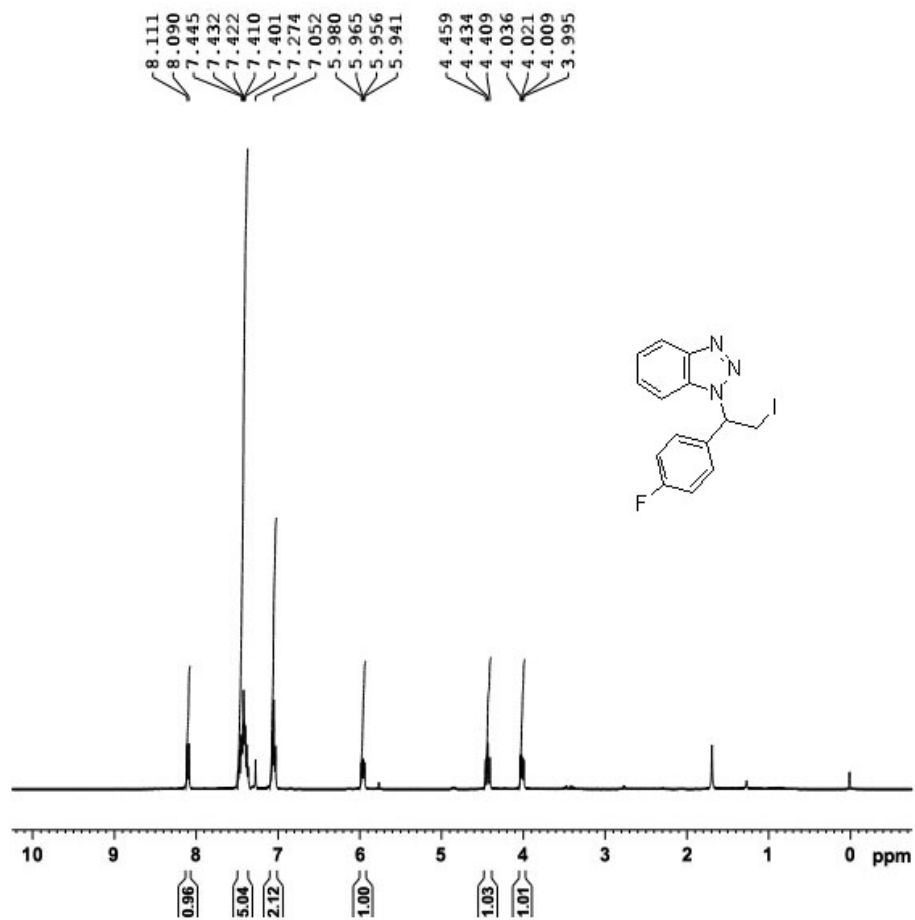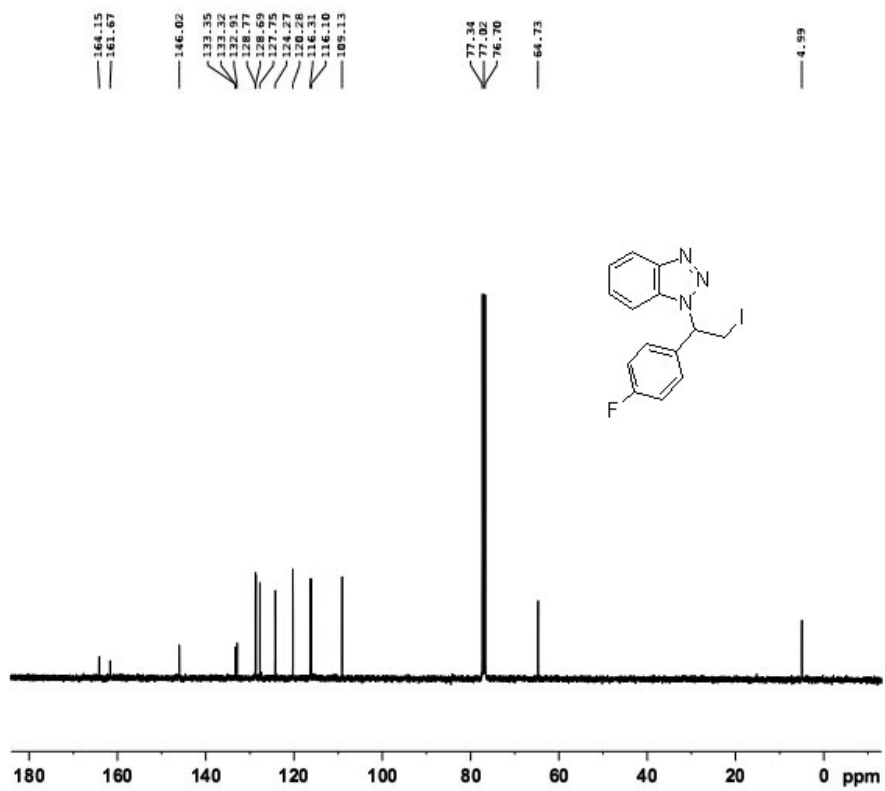

# Compound 3h

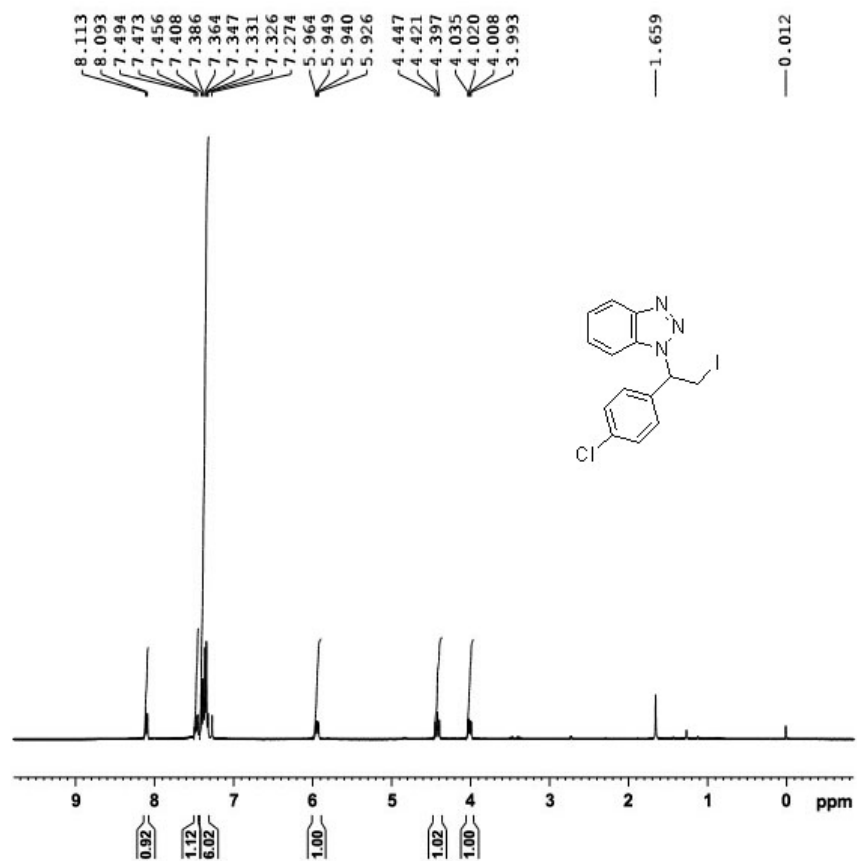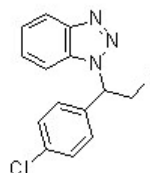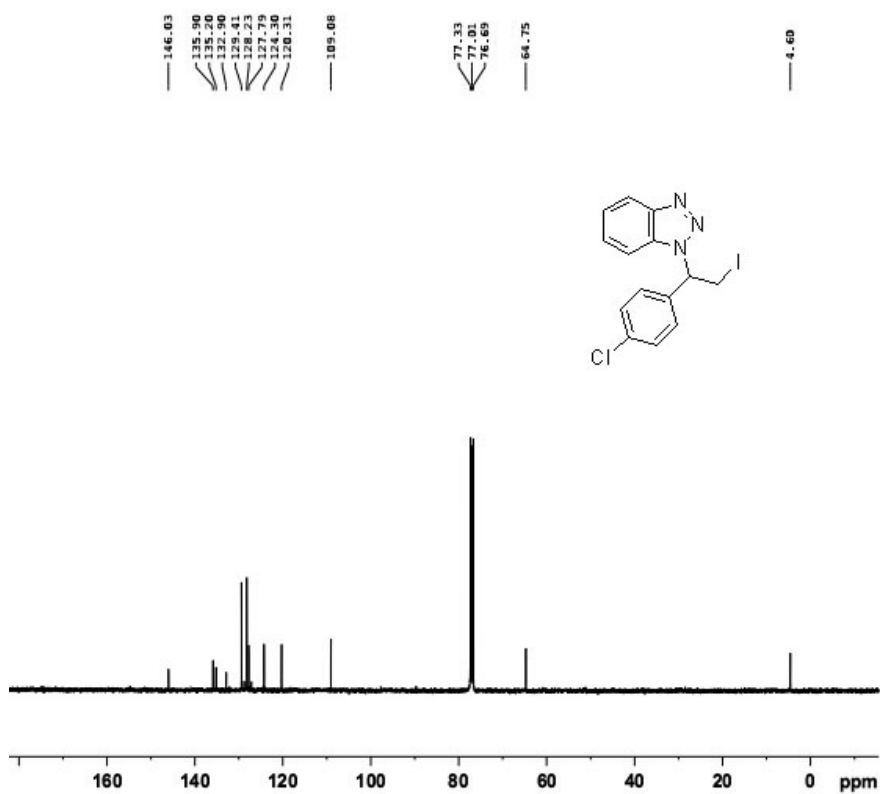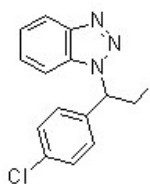

# Compound 3i

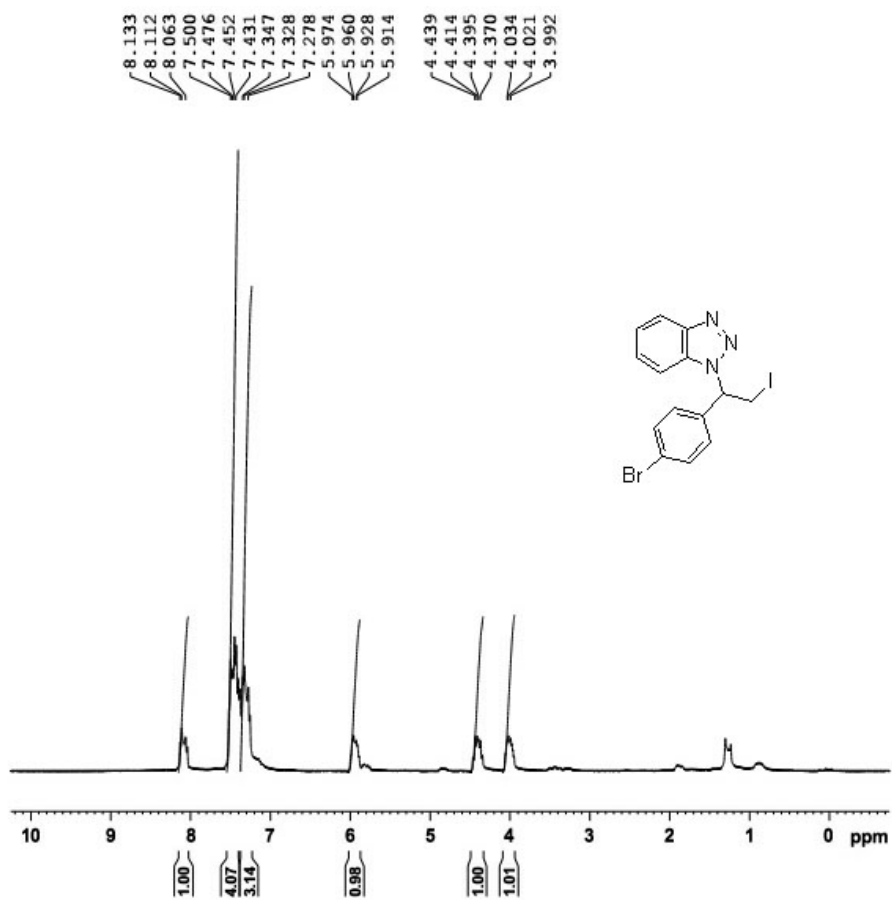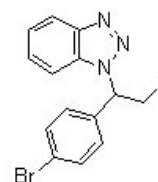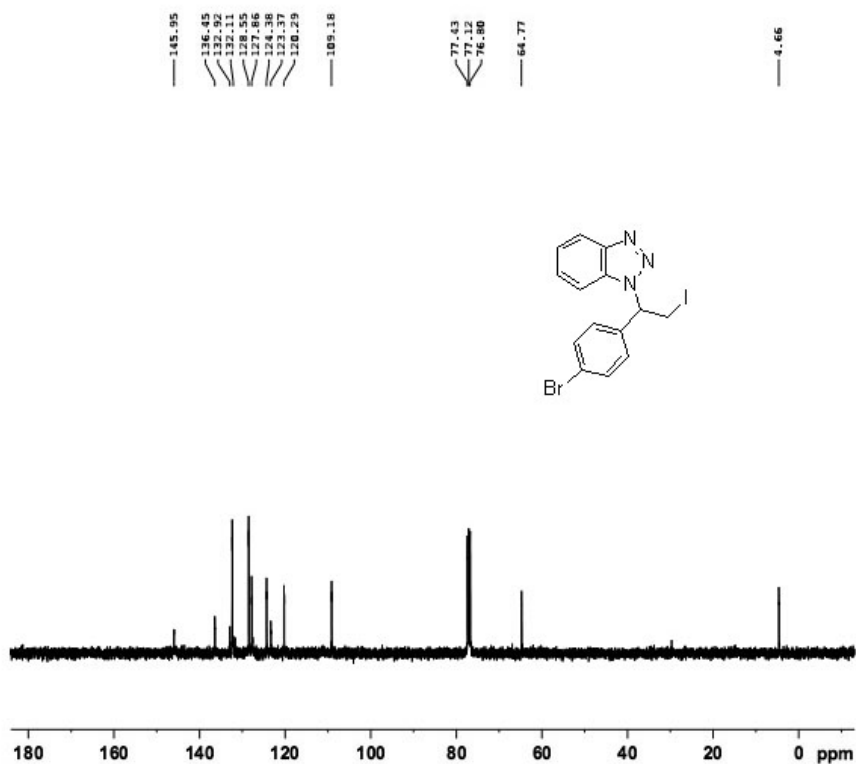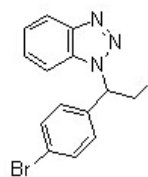

Compound 3j

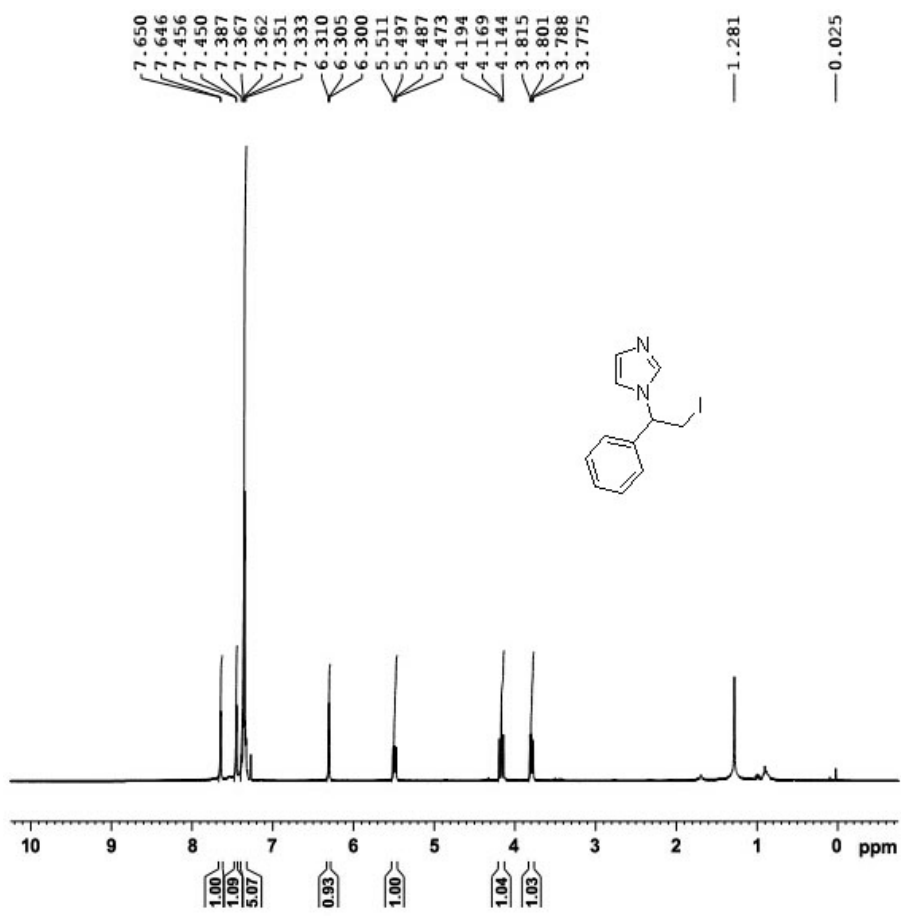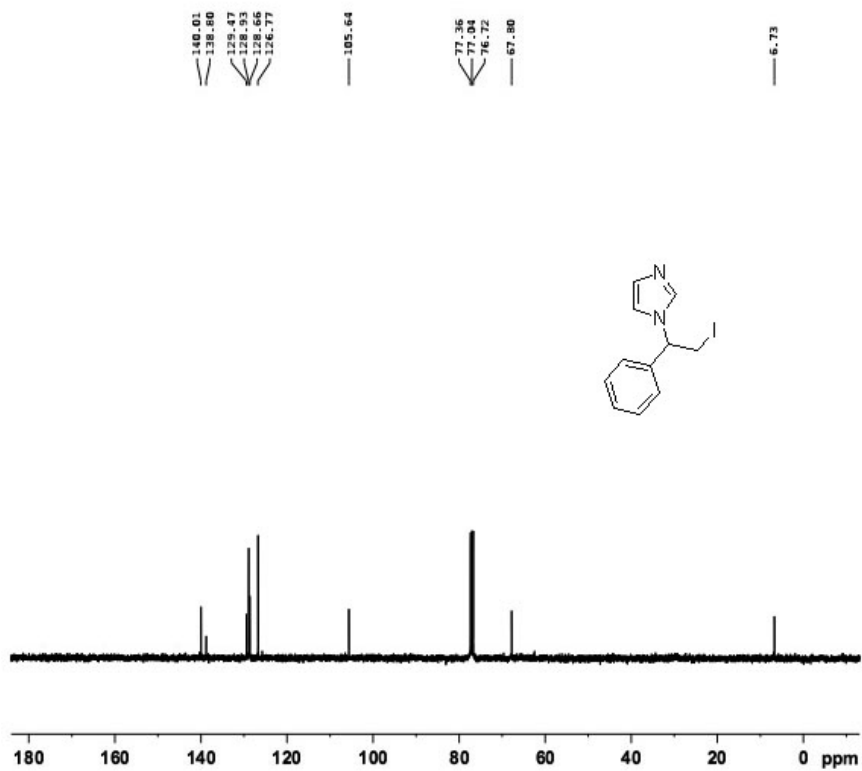



# Compound 3k

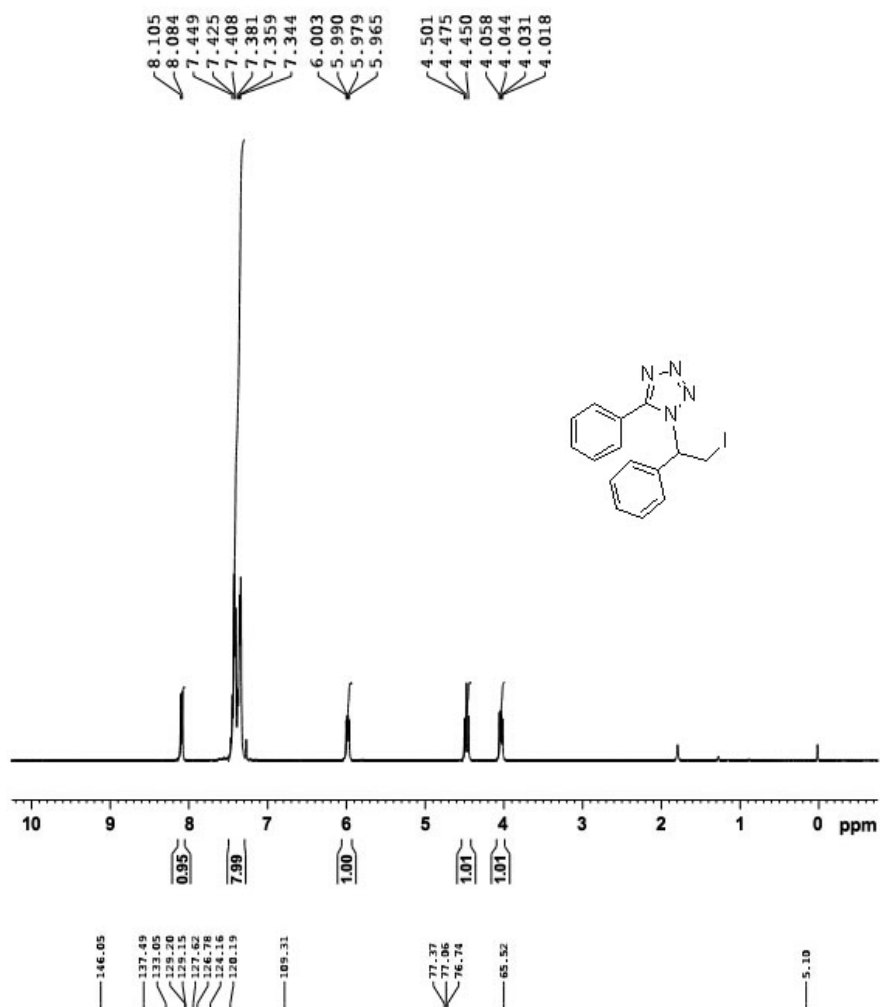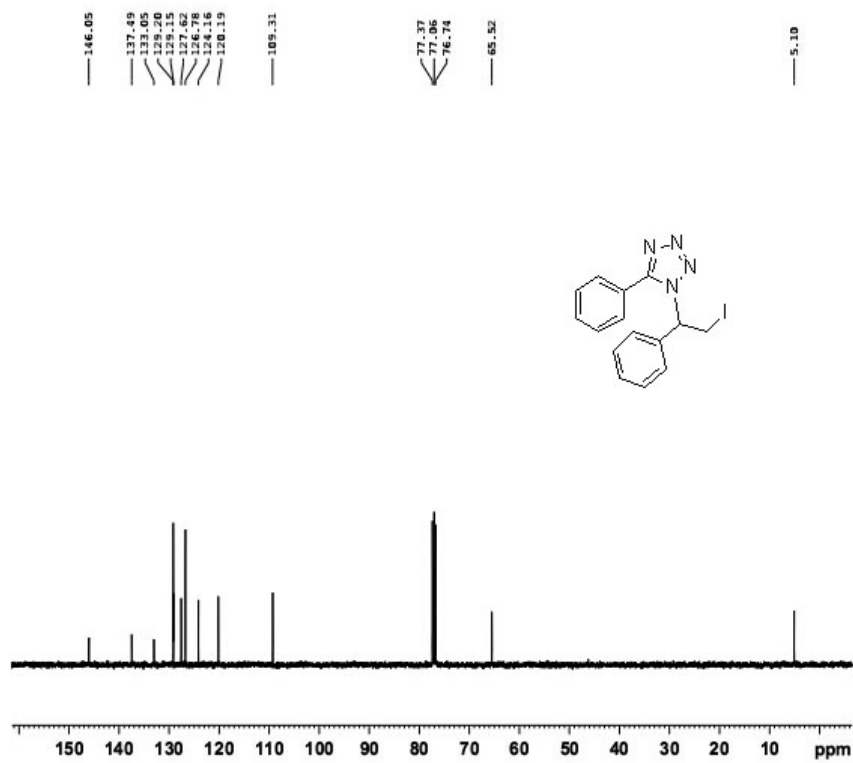

# Compound 3l

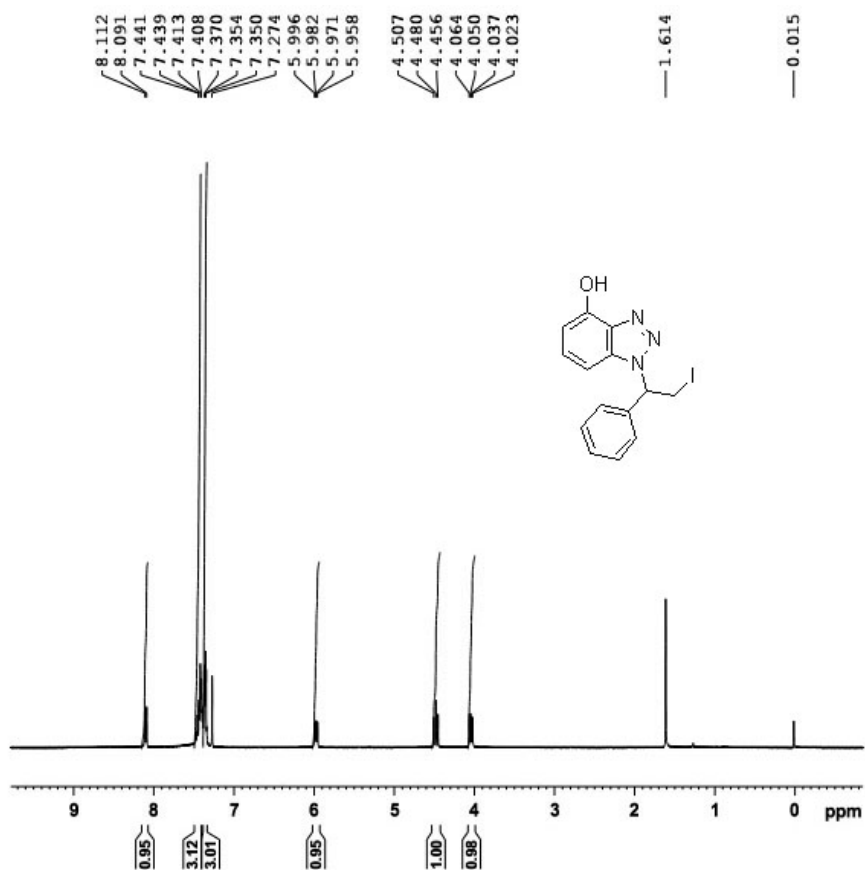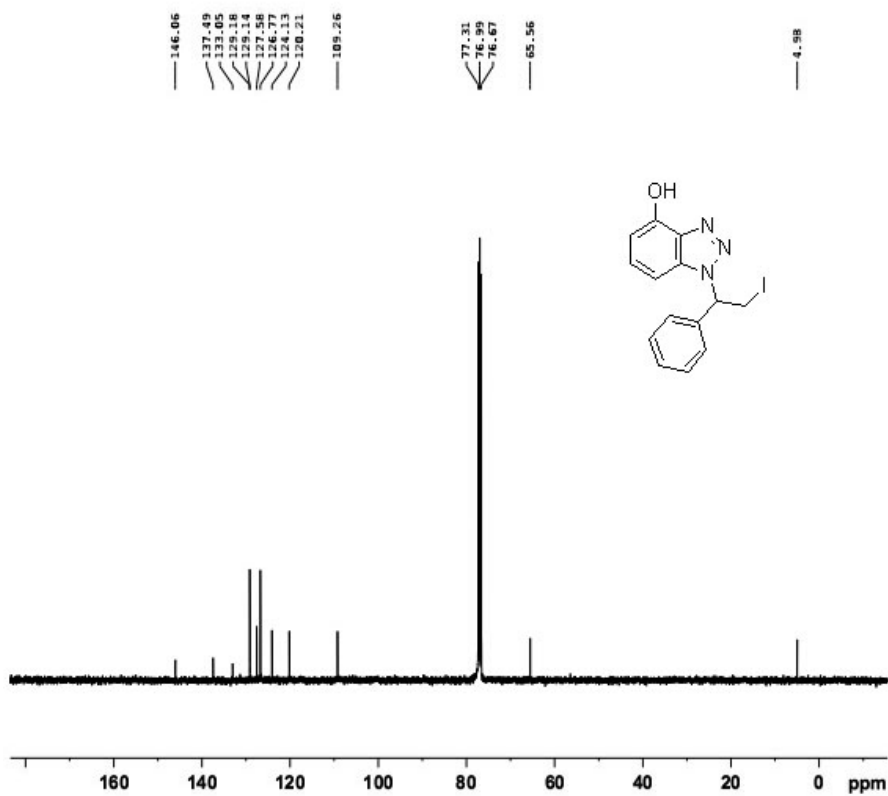

# Compound 3m

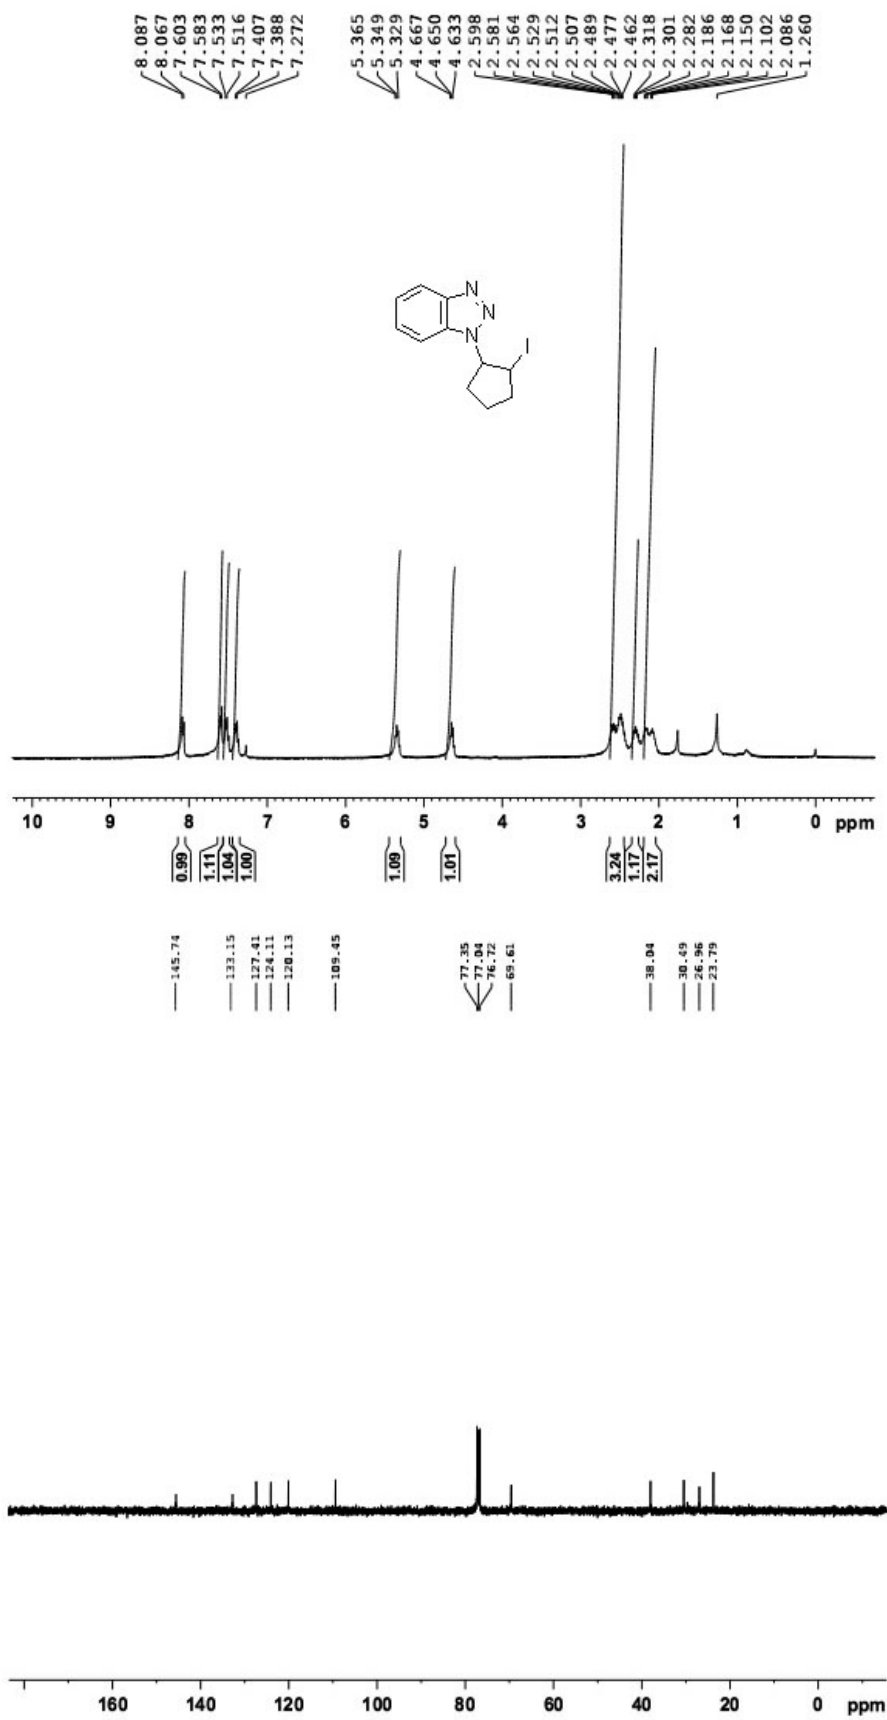

# Compound 3n

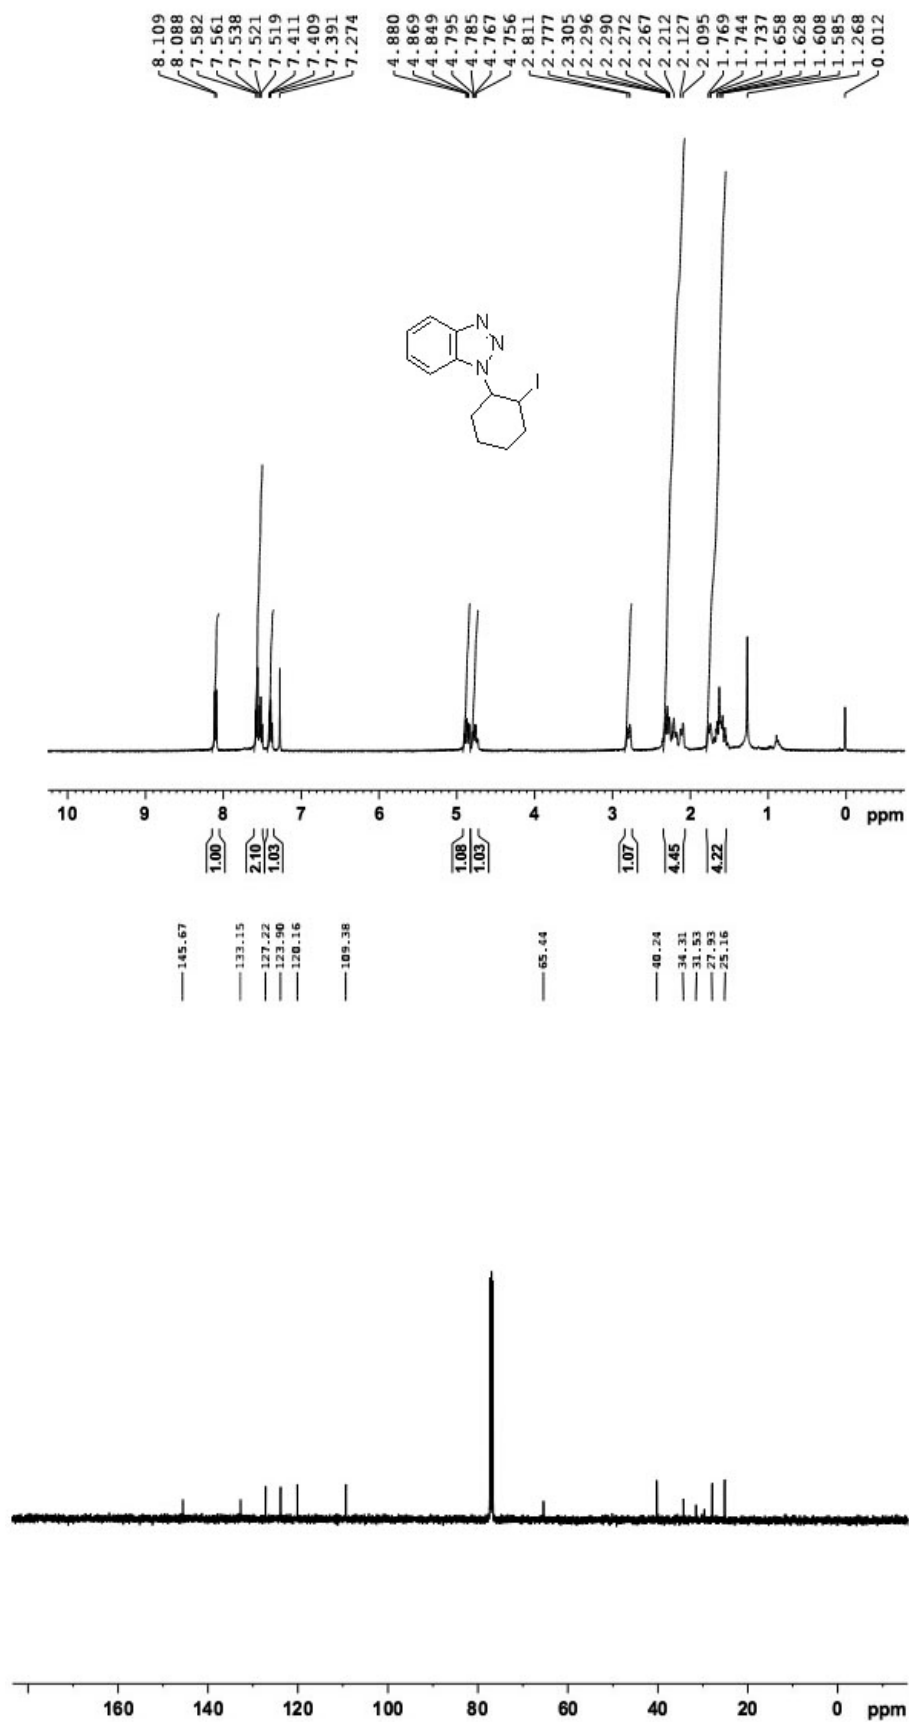

# Compound 3o

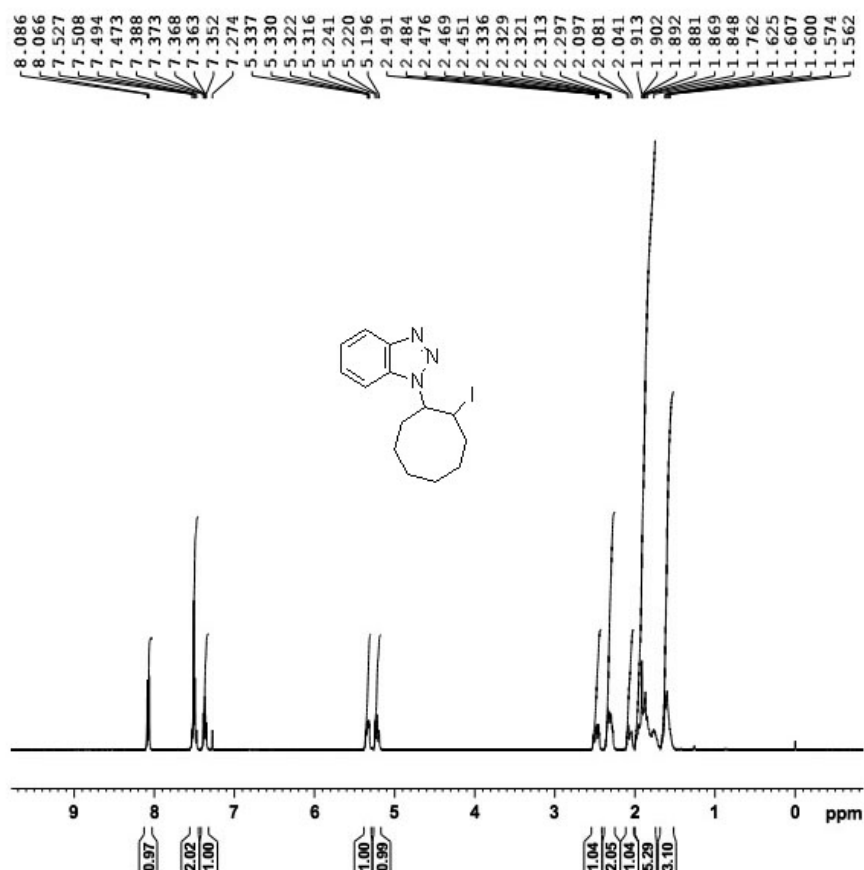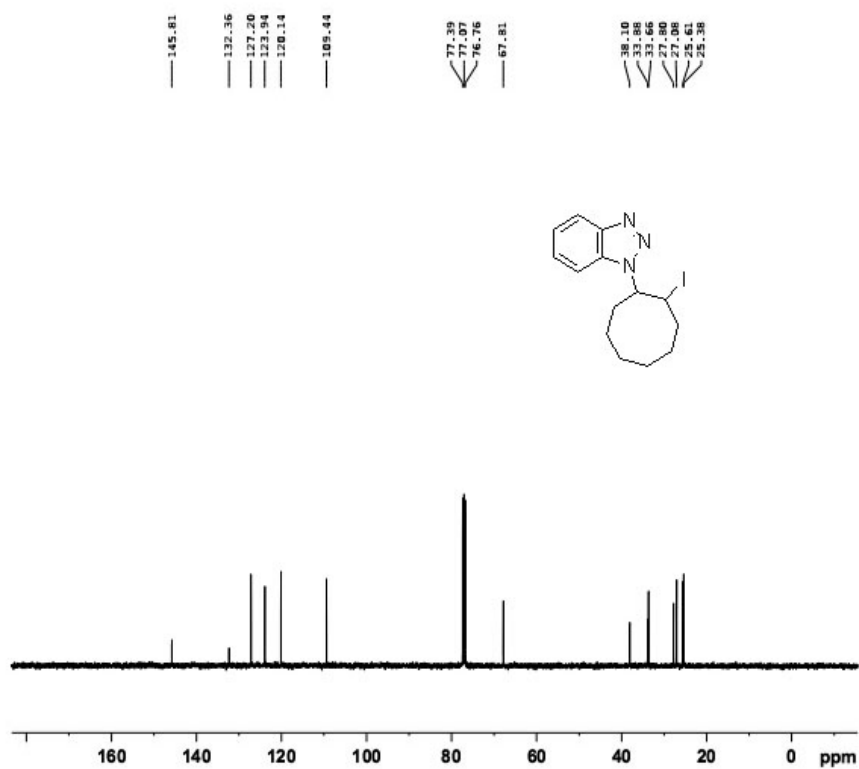

# Compound 3p

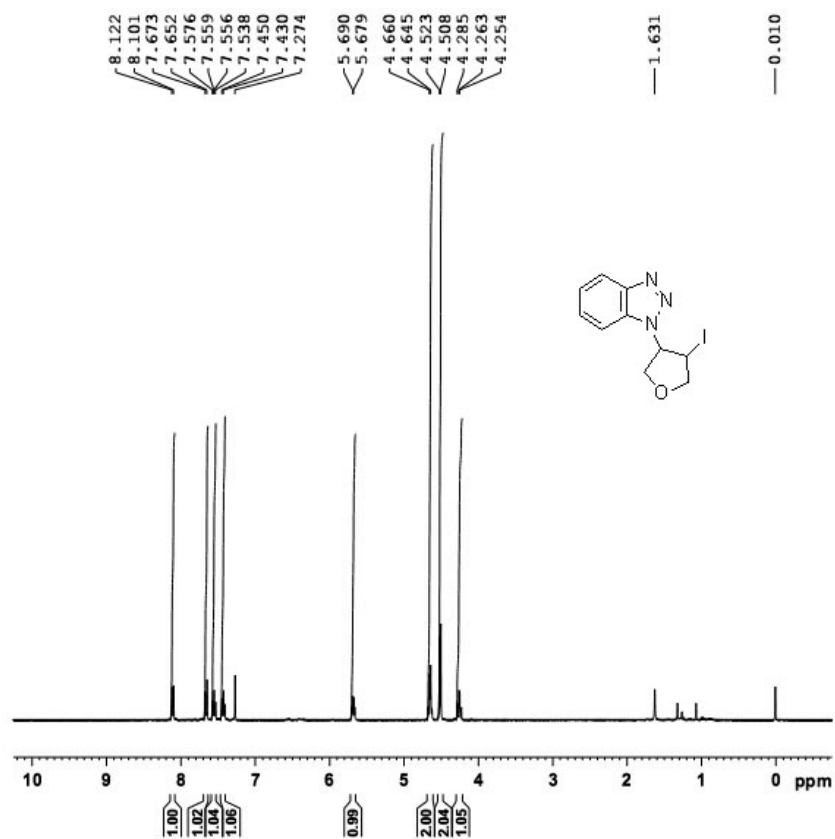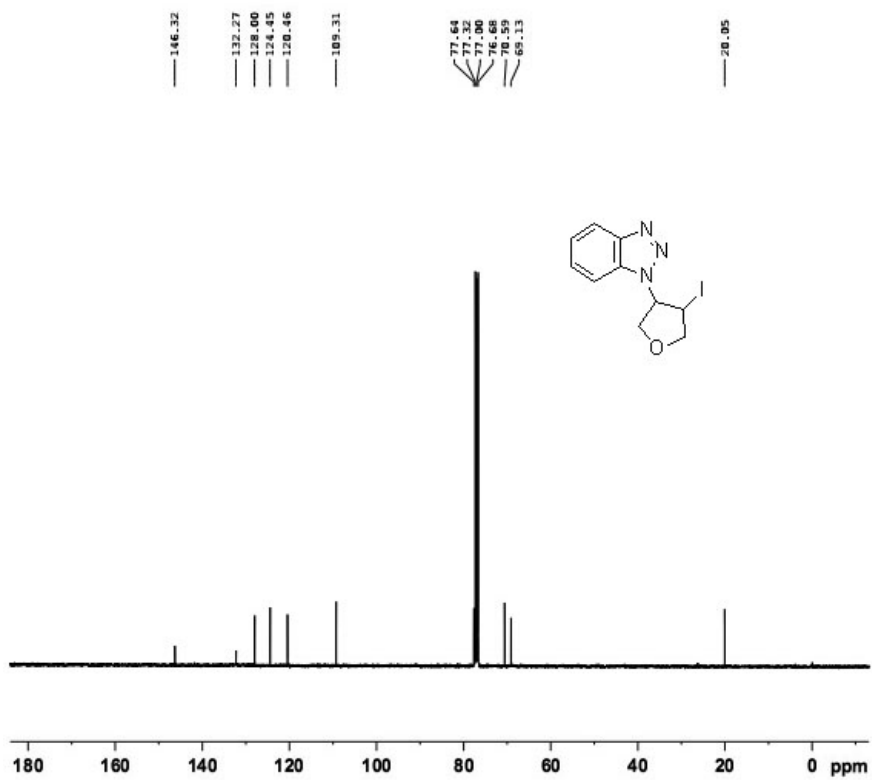

# Compound 3q

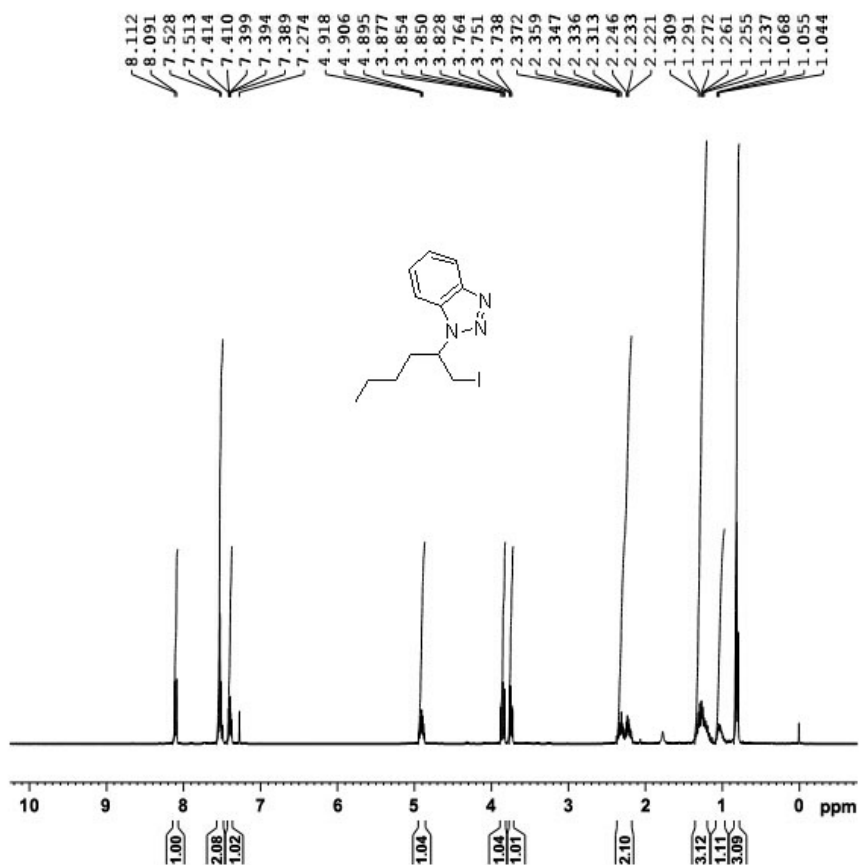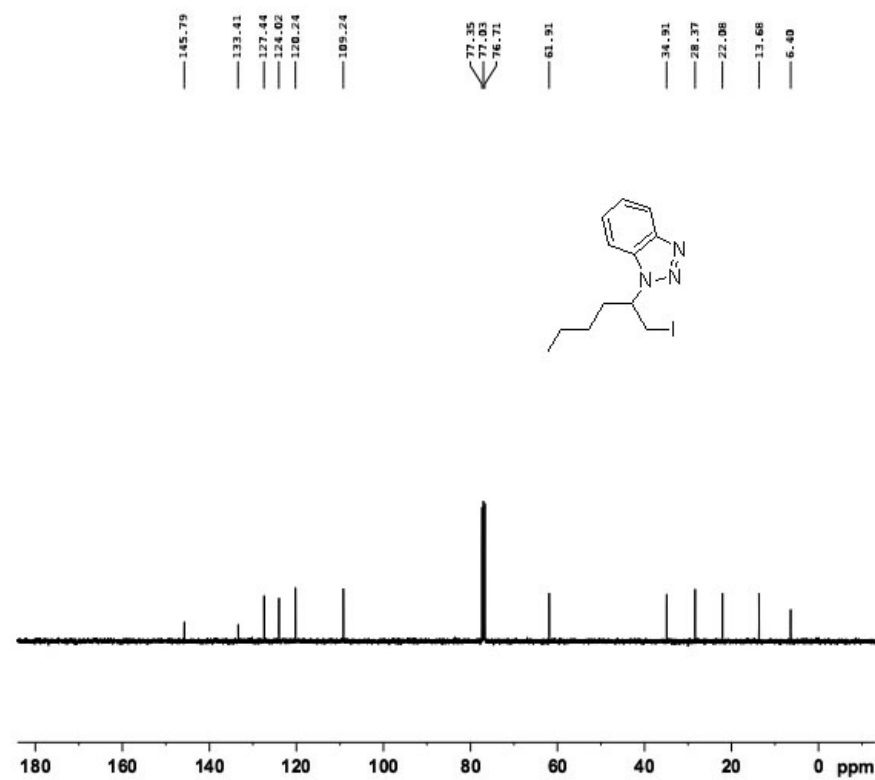

# Compound 3r

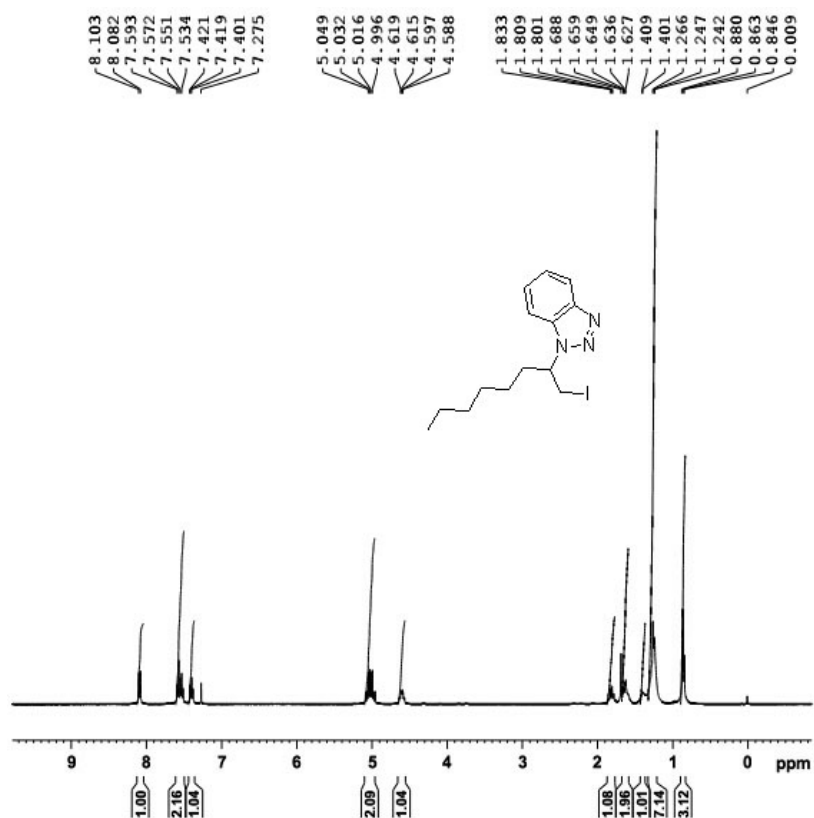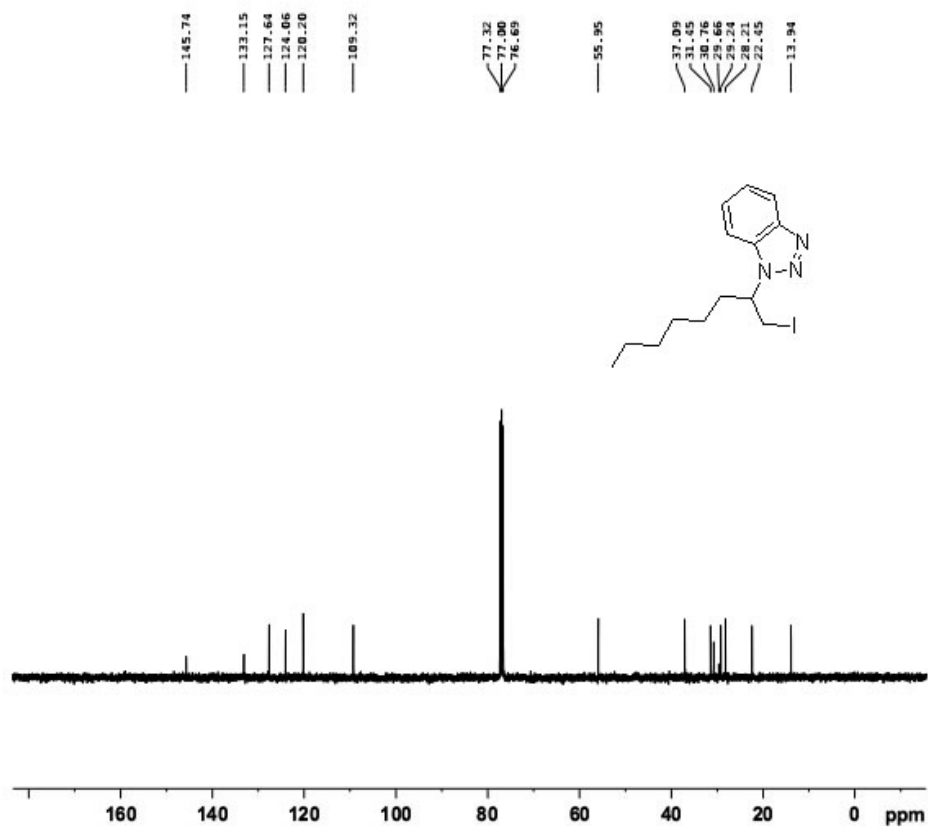



# Compound 3s

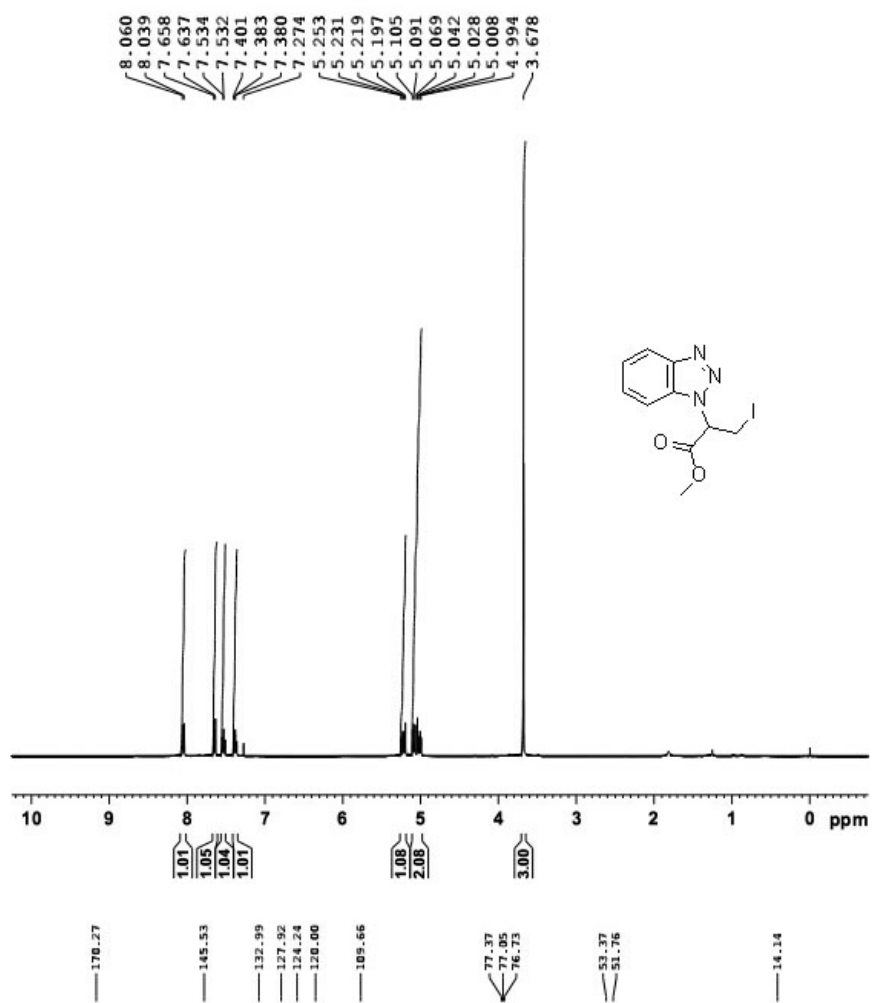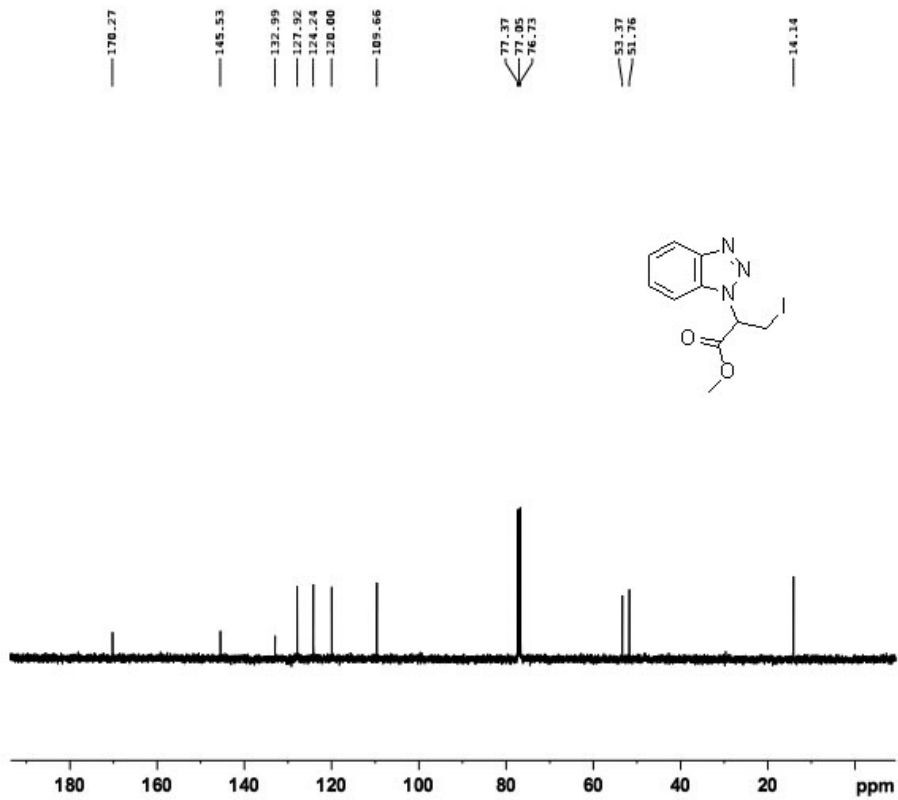

# Compound 3t

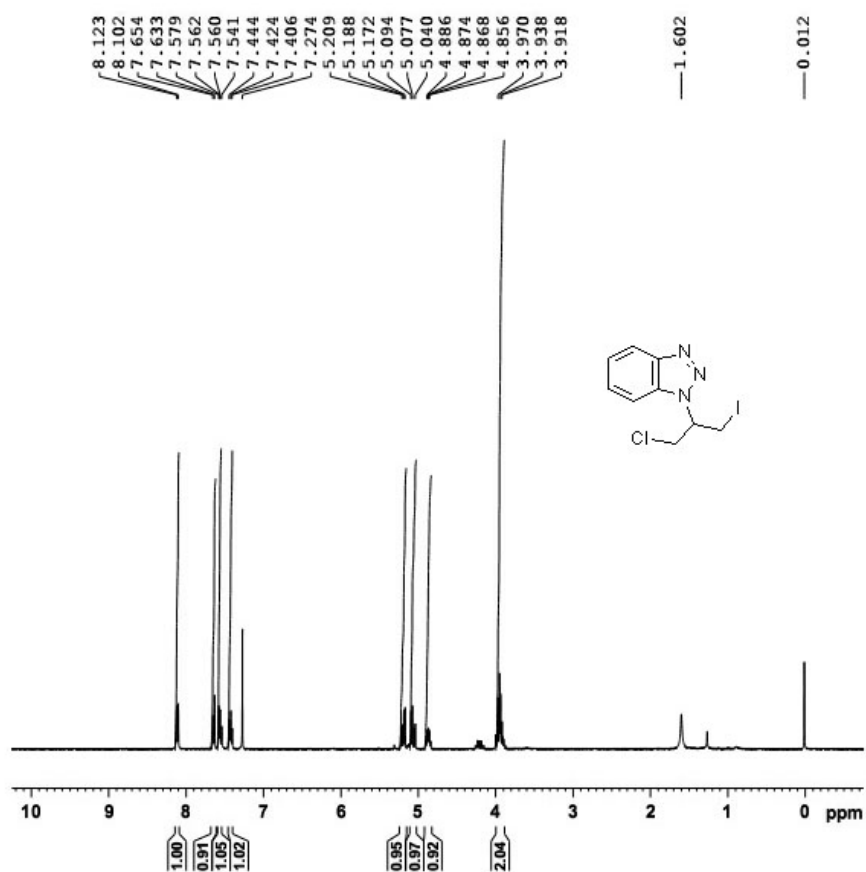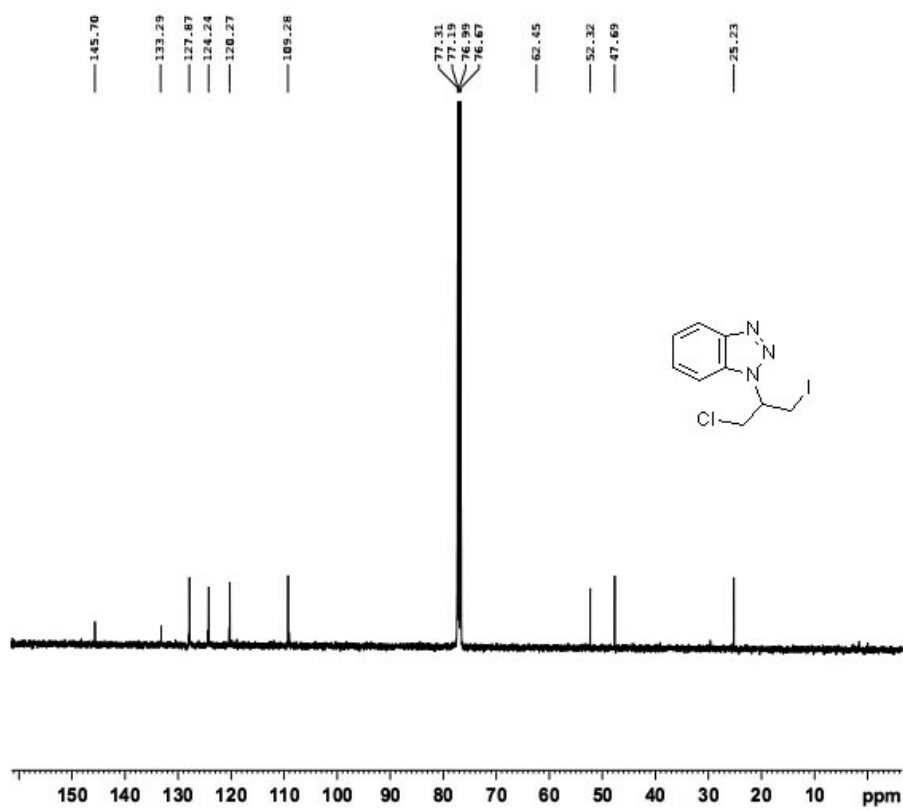

Supplement: c5ra14407h1.pdf [file c5ra14407h1.pdf]
